# Supplementary material for: Cascade reactions of glycine Schiff bases and chiral phase transfer catalysts in the synthesis of α-amino acids 3-substituted phthalides or isoindolinones
Source: Royal Society of Chemistry journal article supplement (doi:10.1039/c3ra46268d), 2013-12-04
Supplement: c3ra46268d.pdf [file c3ra46268d.pdf]

## Supporting information

### **Cascade reactions of glycine Schiff bases and chiral phase transfer catalysts in the synthesis of $\alpha$ -amino acids 3-substituted phthalides and isoindolinones**

**Milena Perillo, Antonia Di Mola, Rosanna Filosa, Laura Palombi and Antonio Massa\***

*Dipartimento di Chimica e Biologia, Università di Salerno, Via Giovanni Paolo II, 132, 84084-Fisciano (SA)-Italy. Tel: +39-089-969565. Fax: +39-089-969-603 E-mail: amassa@unisa.it*

#### **Table of contents:**

|                                                        |       |
|--------------------------------------------------------|-------|
| <sup>1</sup> H-NMR and <sup>13</sup> C-NMR copies..... | 2-15  |
| HPLC traces.....                                       | 16-18 |

### Major diastereomer

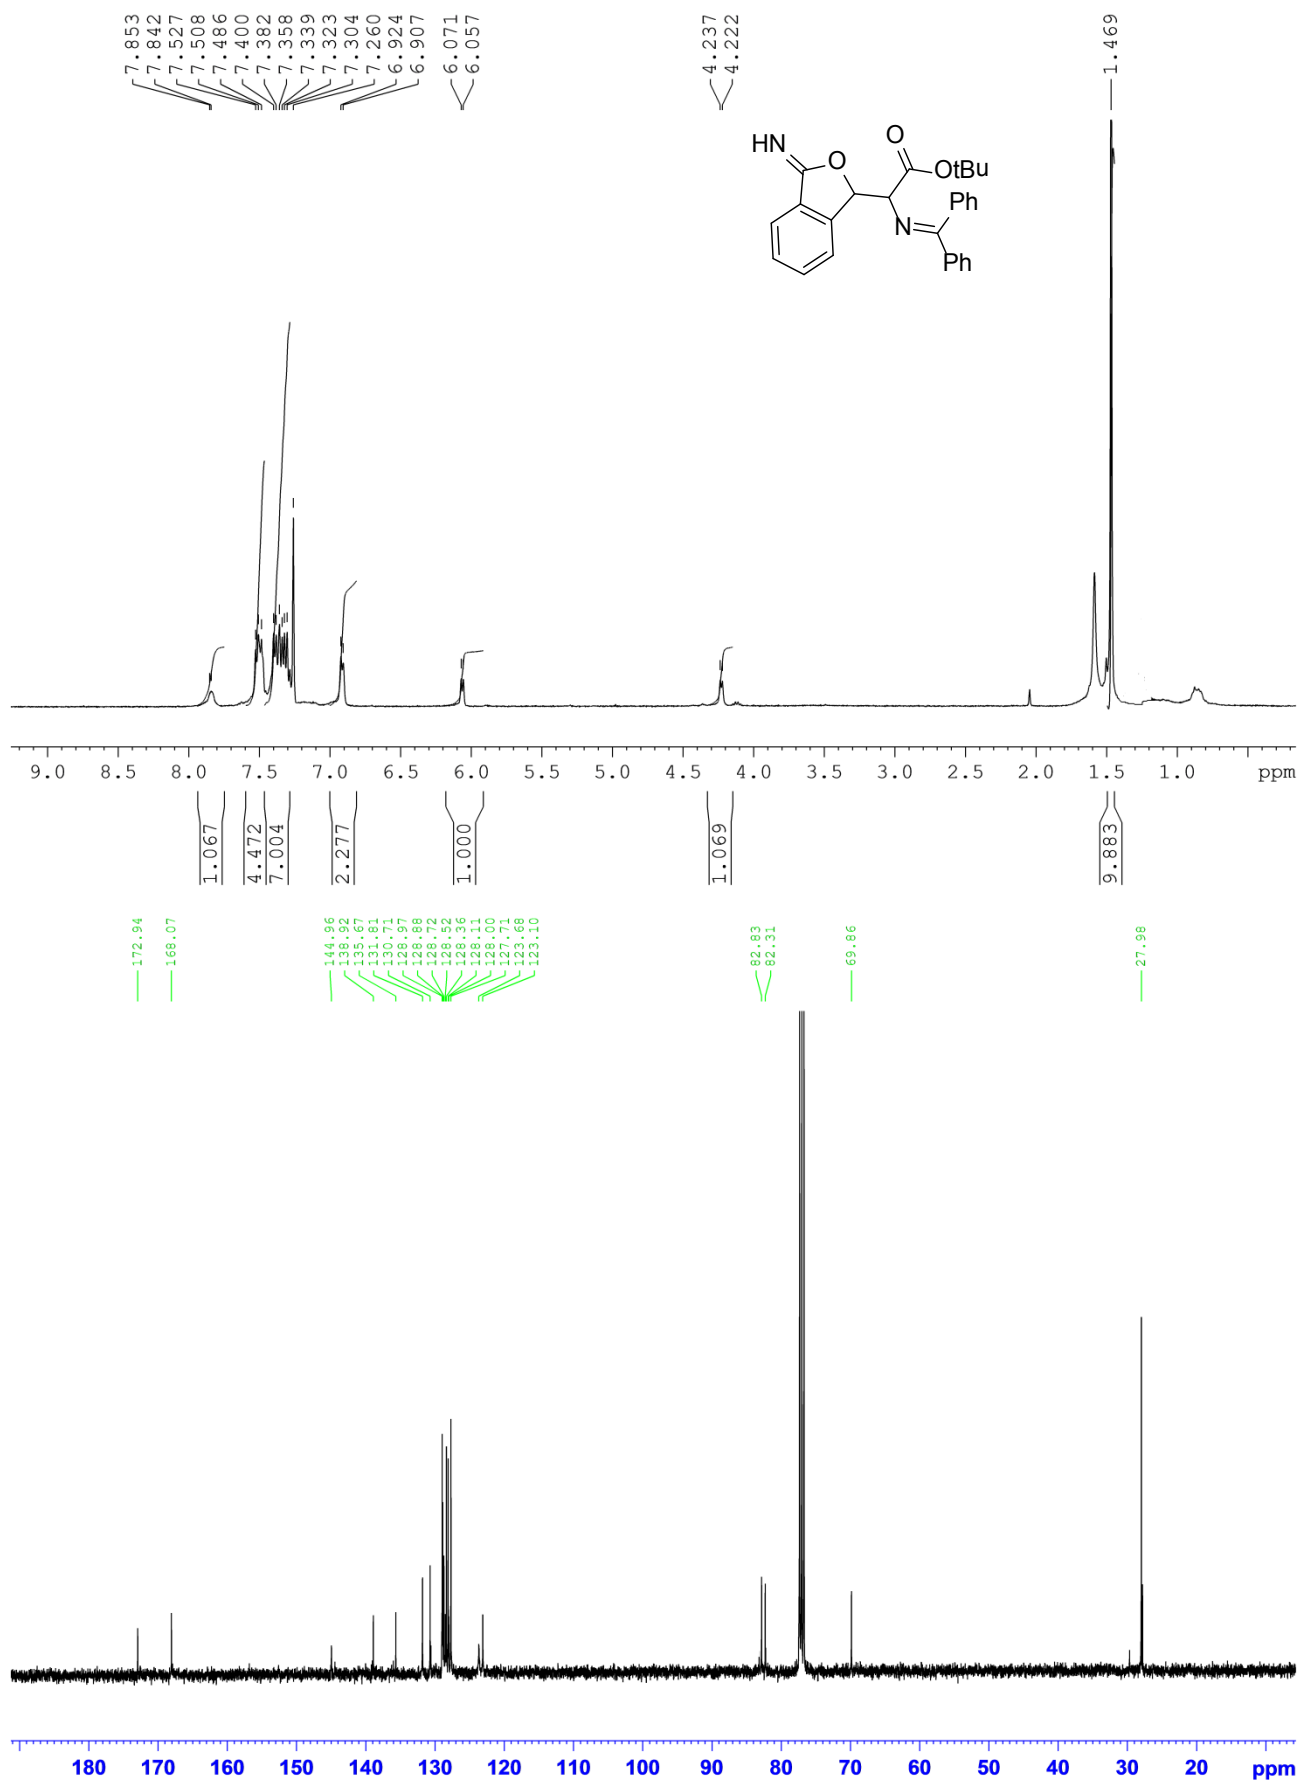

### Major diastereomer

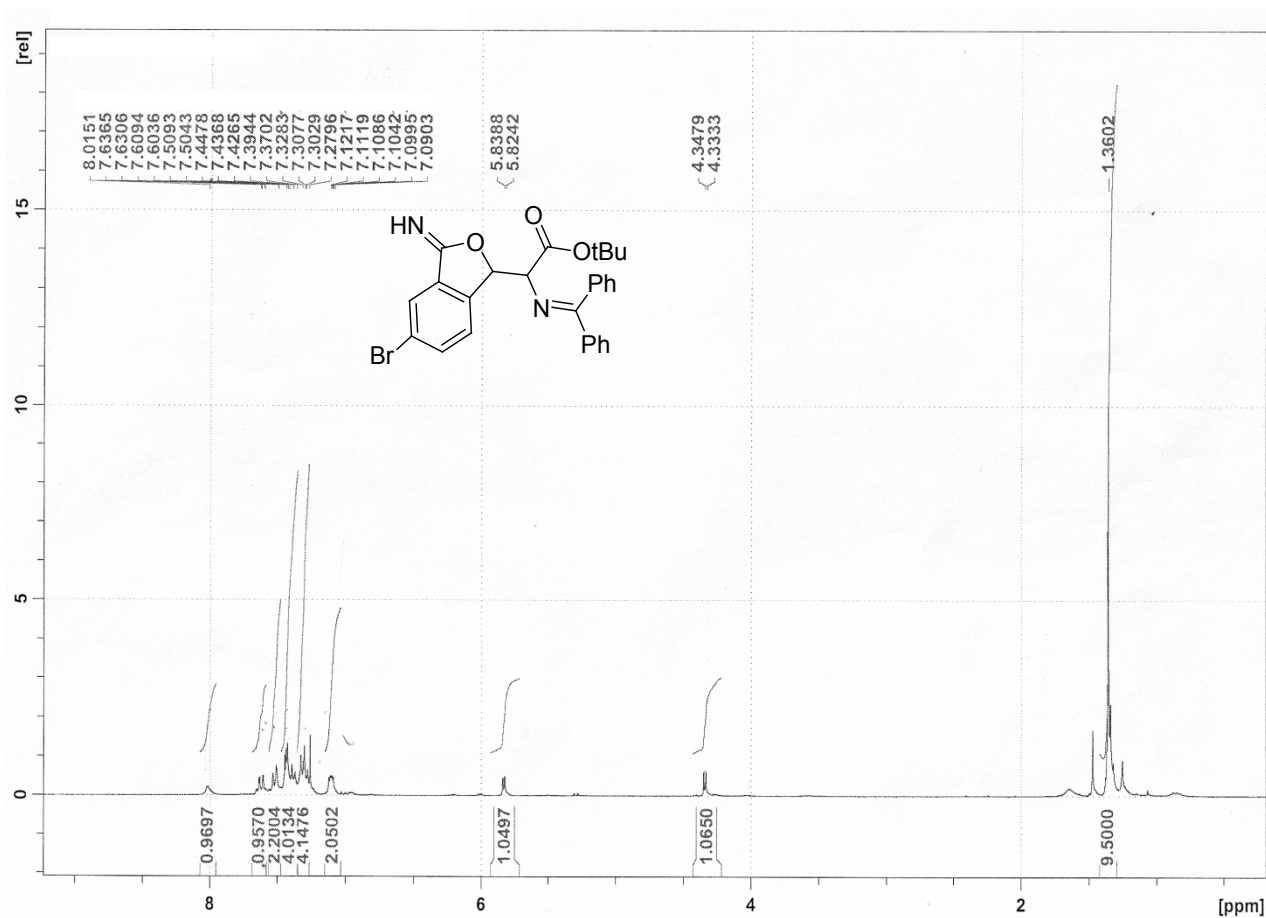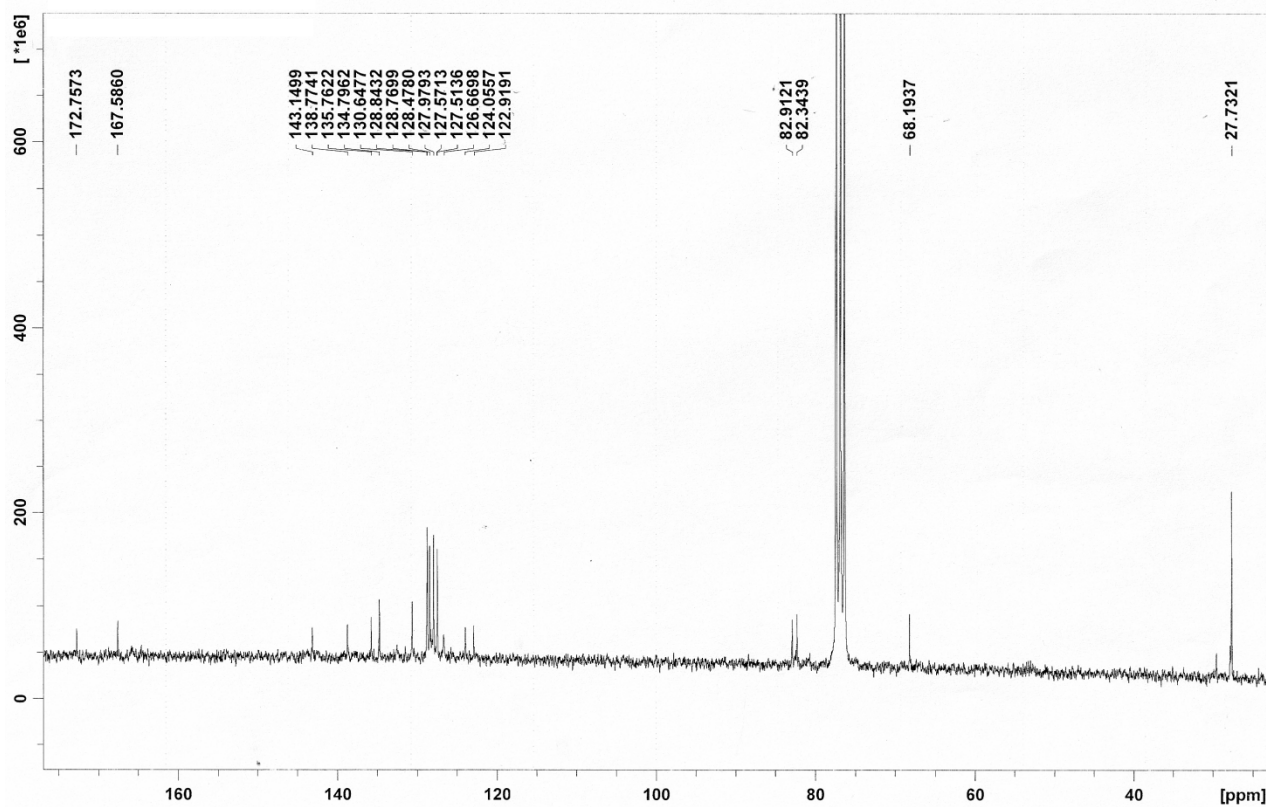

### Mixture of diastereomers

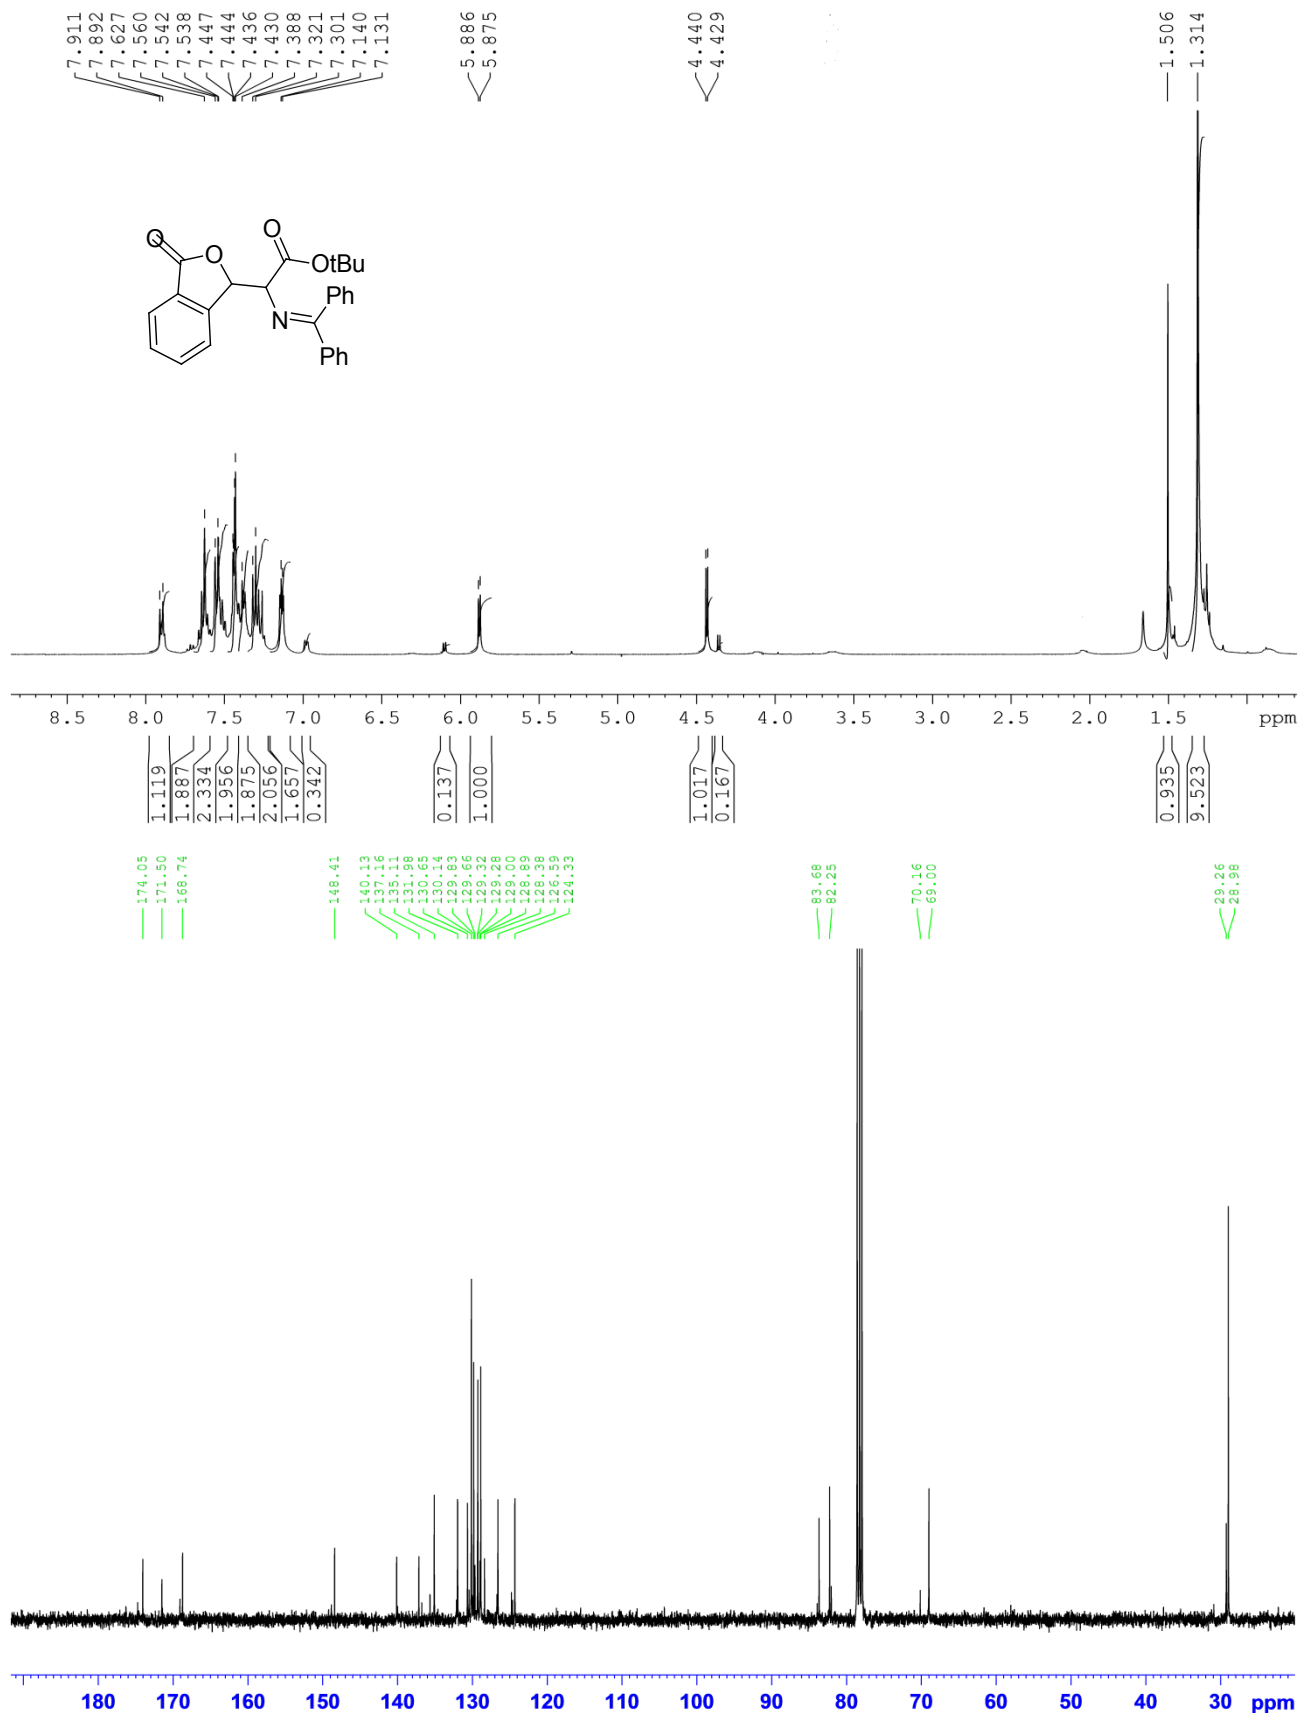

### Single diastereomer

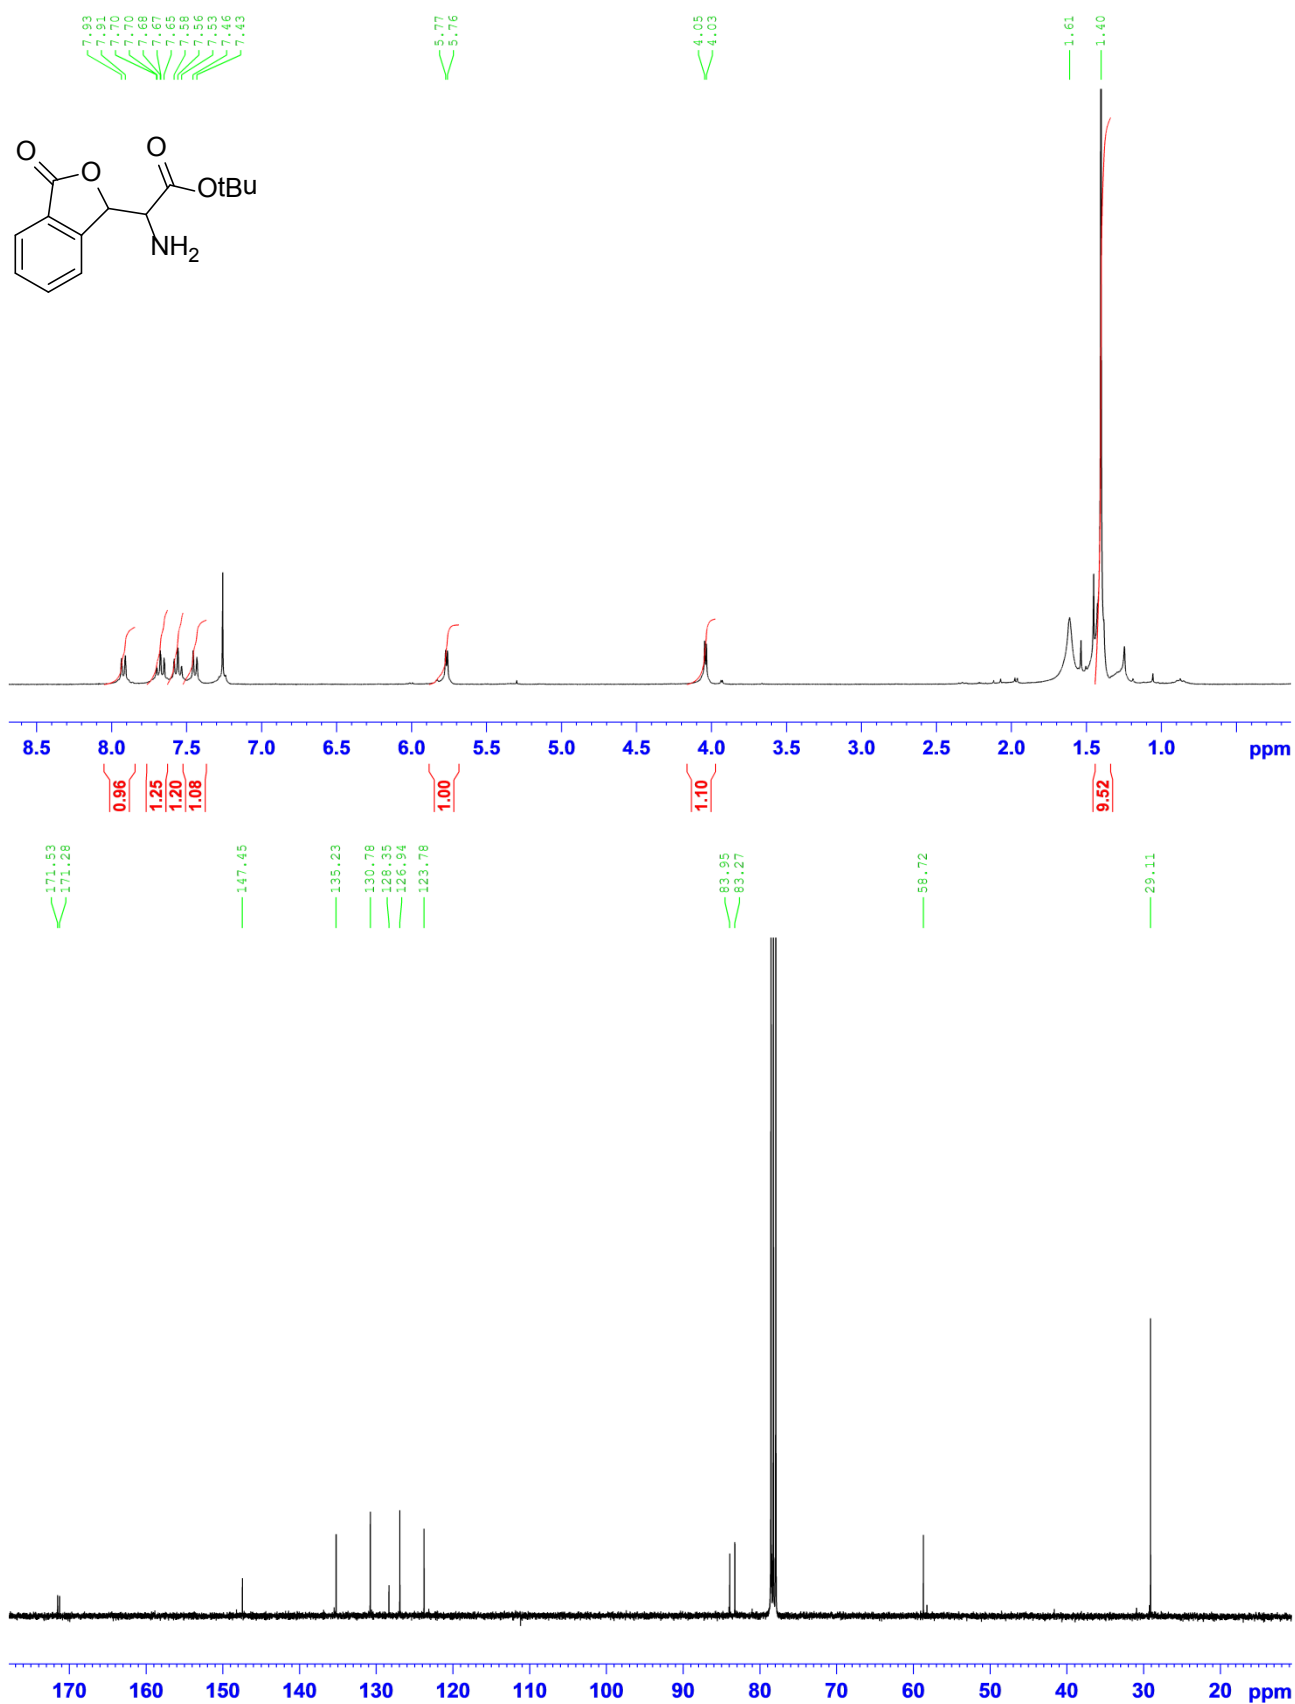

### Single diastereomer

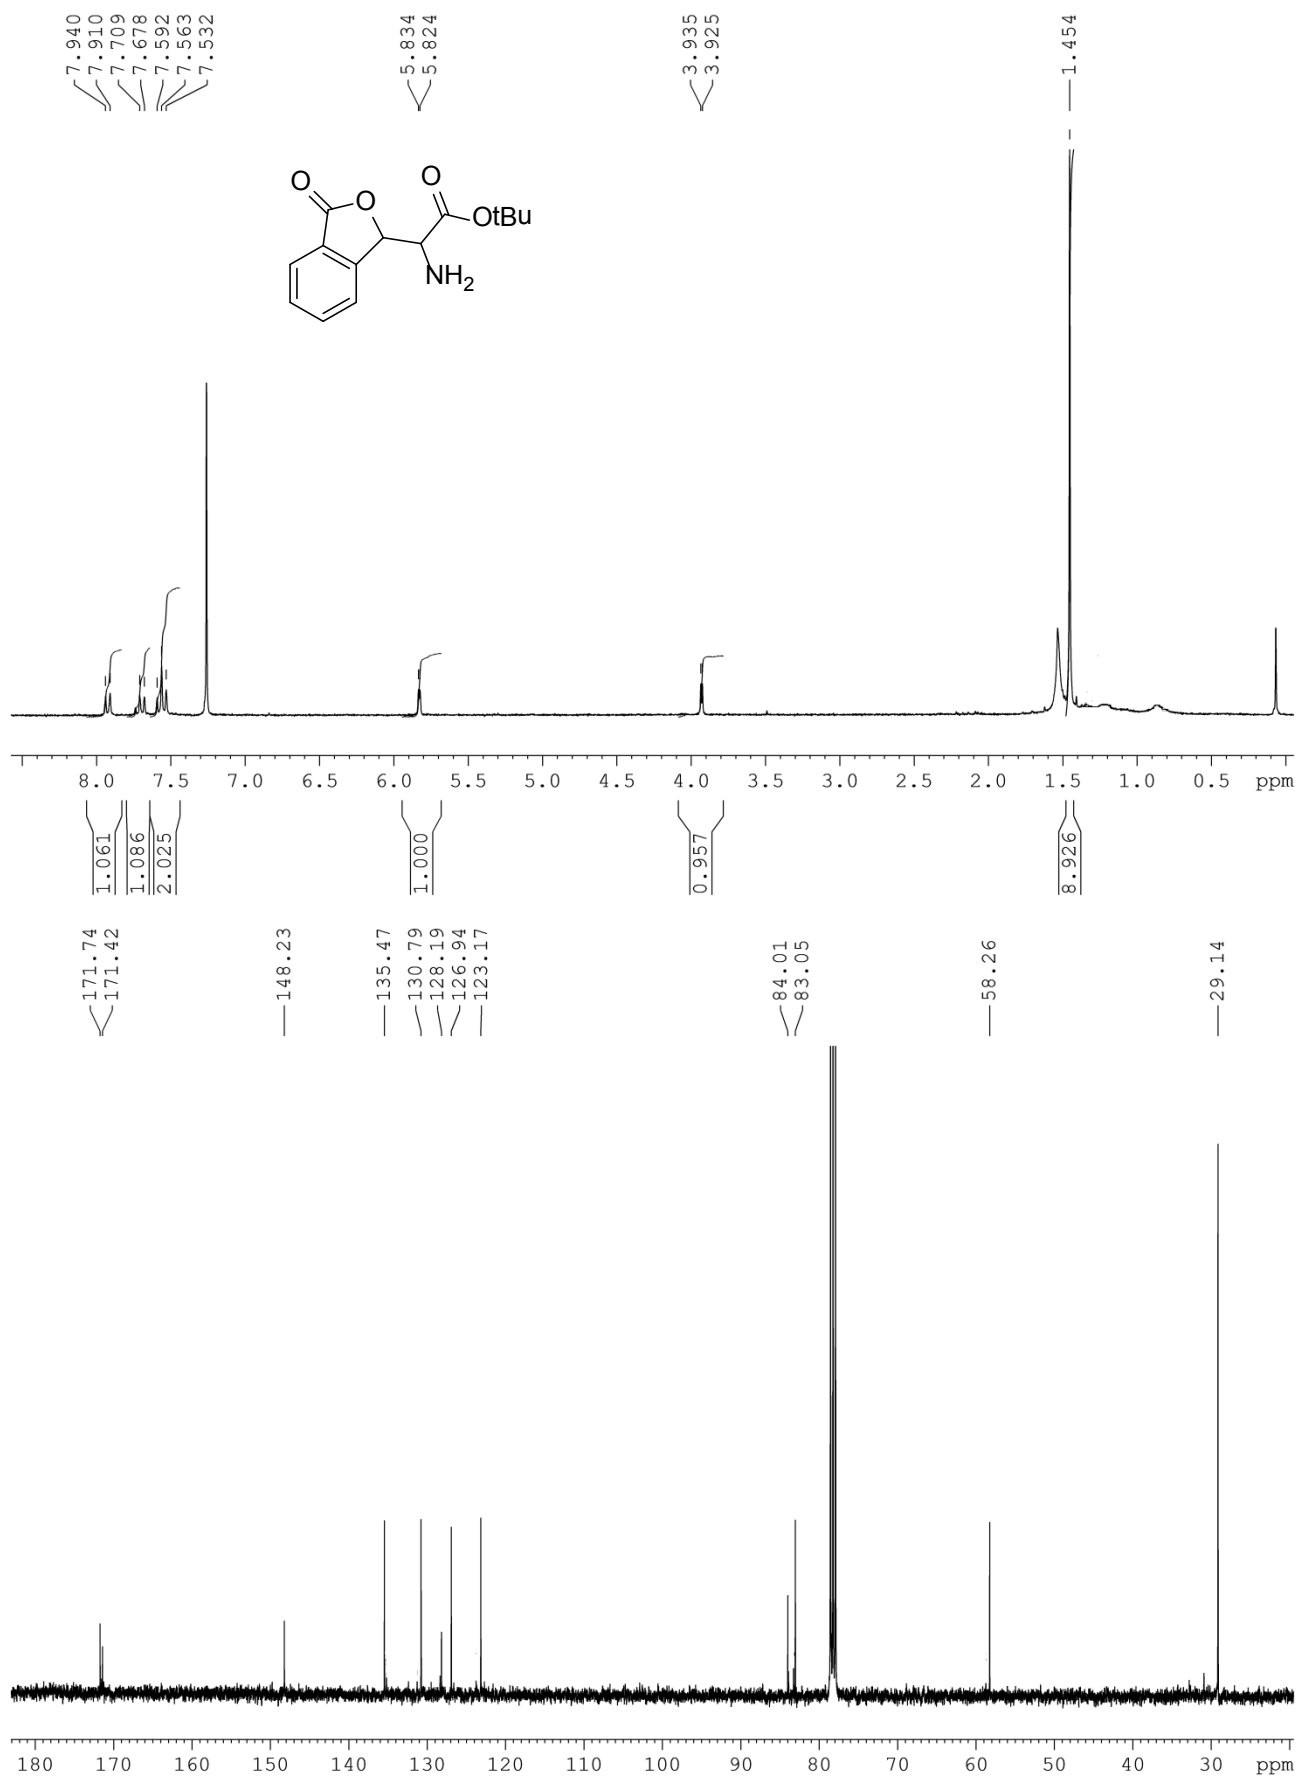

### Single diastereomer

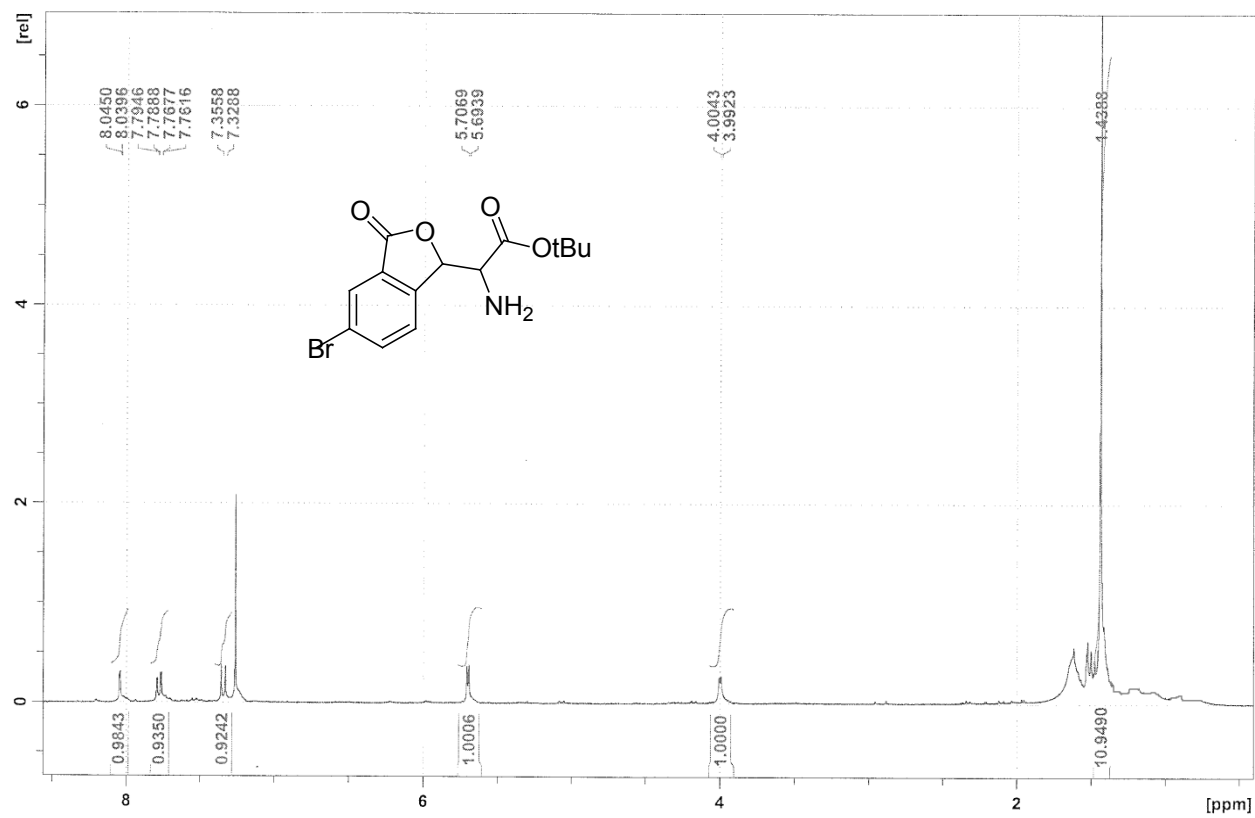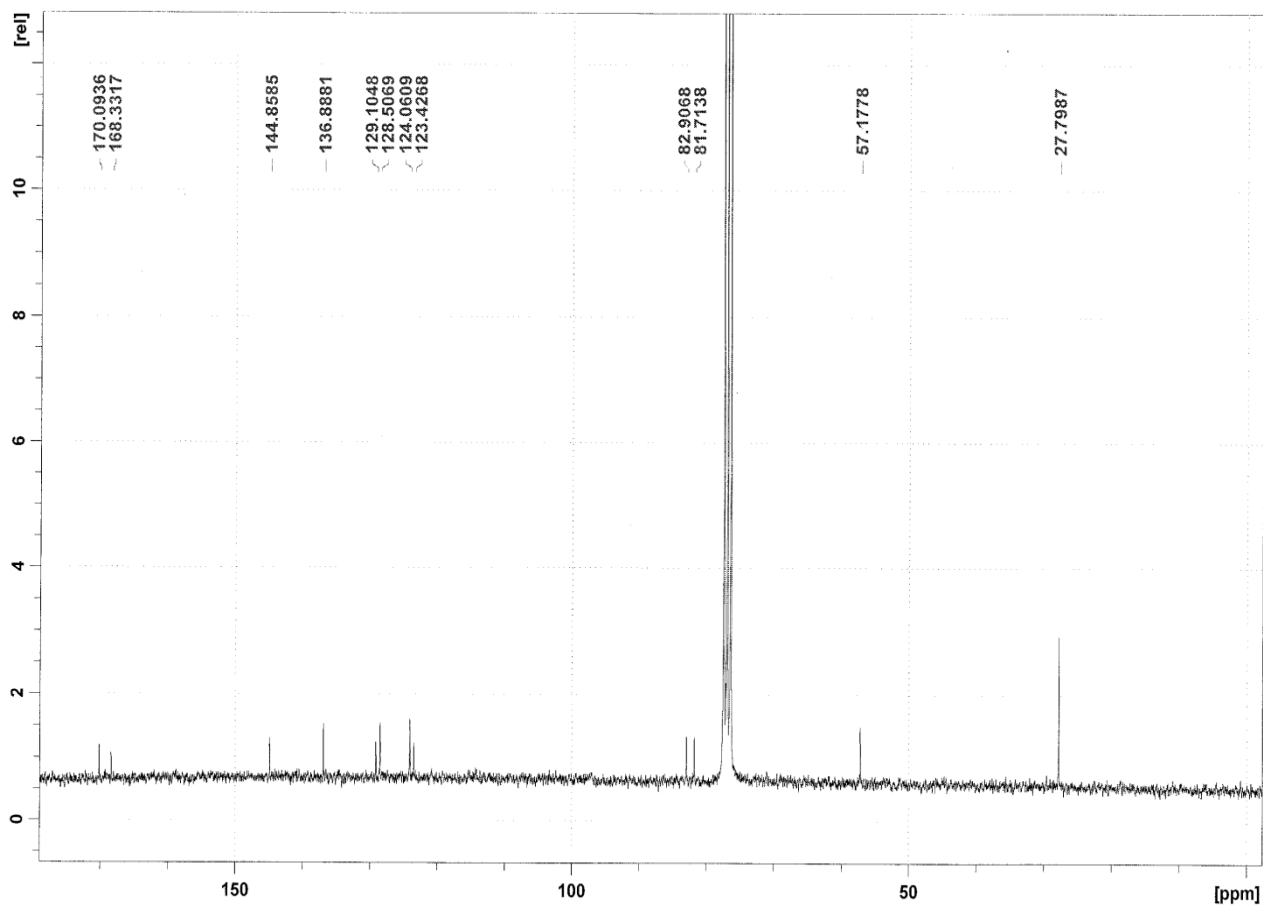

### Single diastereomer

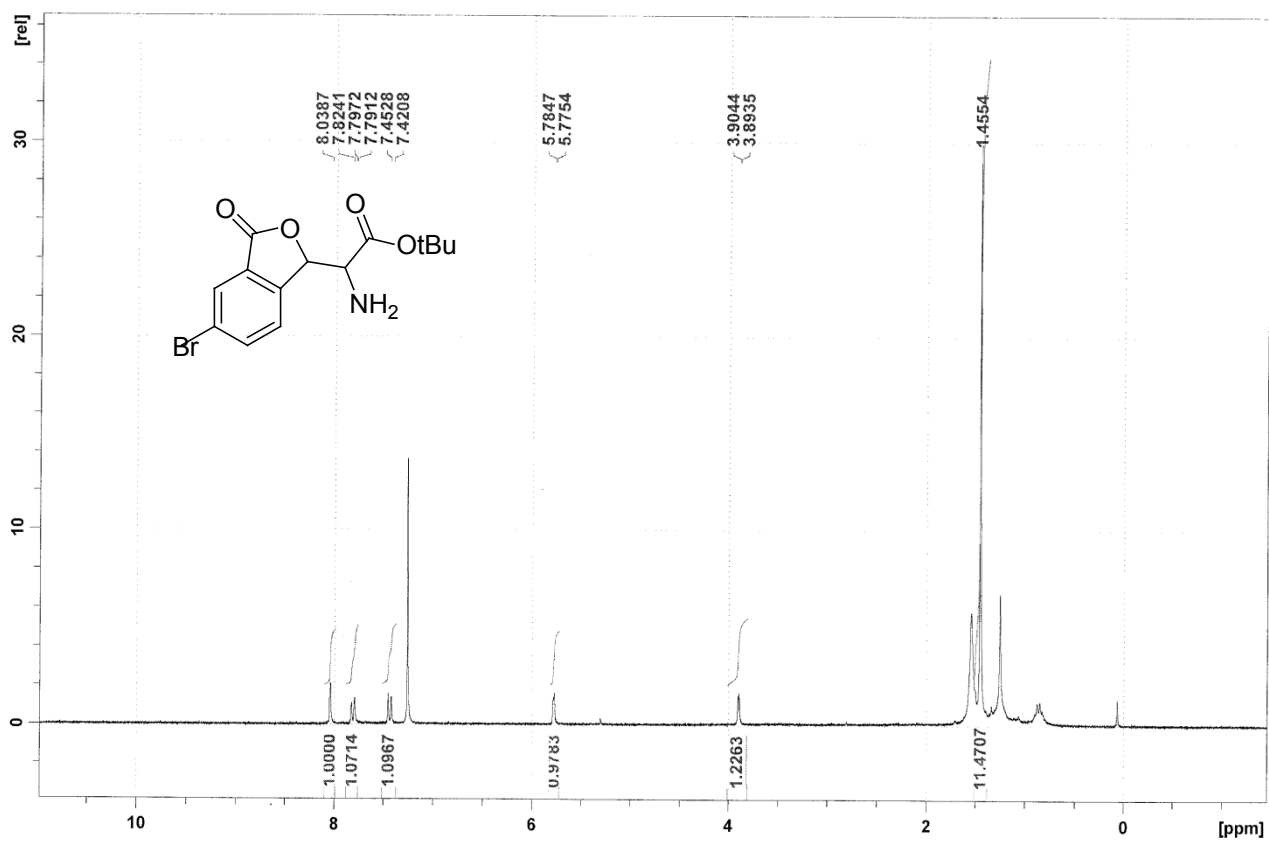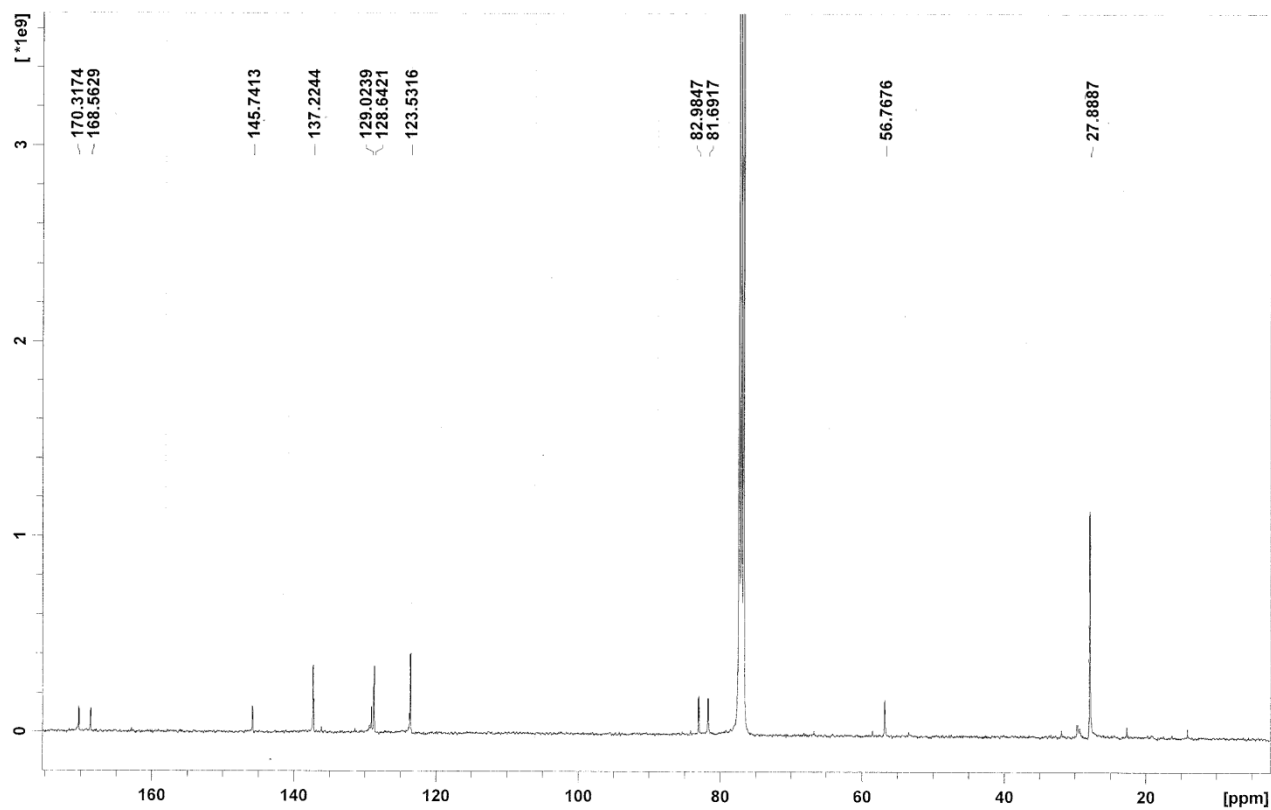



### Mixture of diastereomers

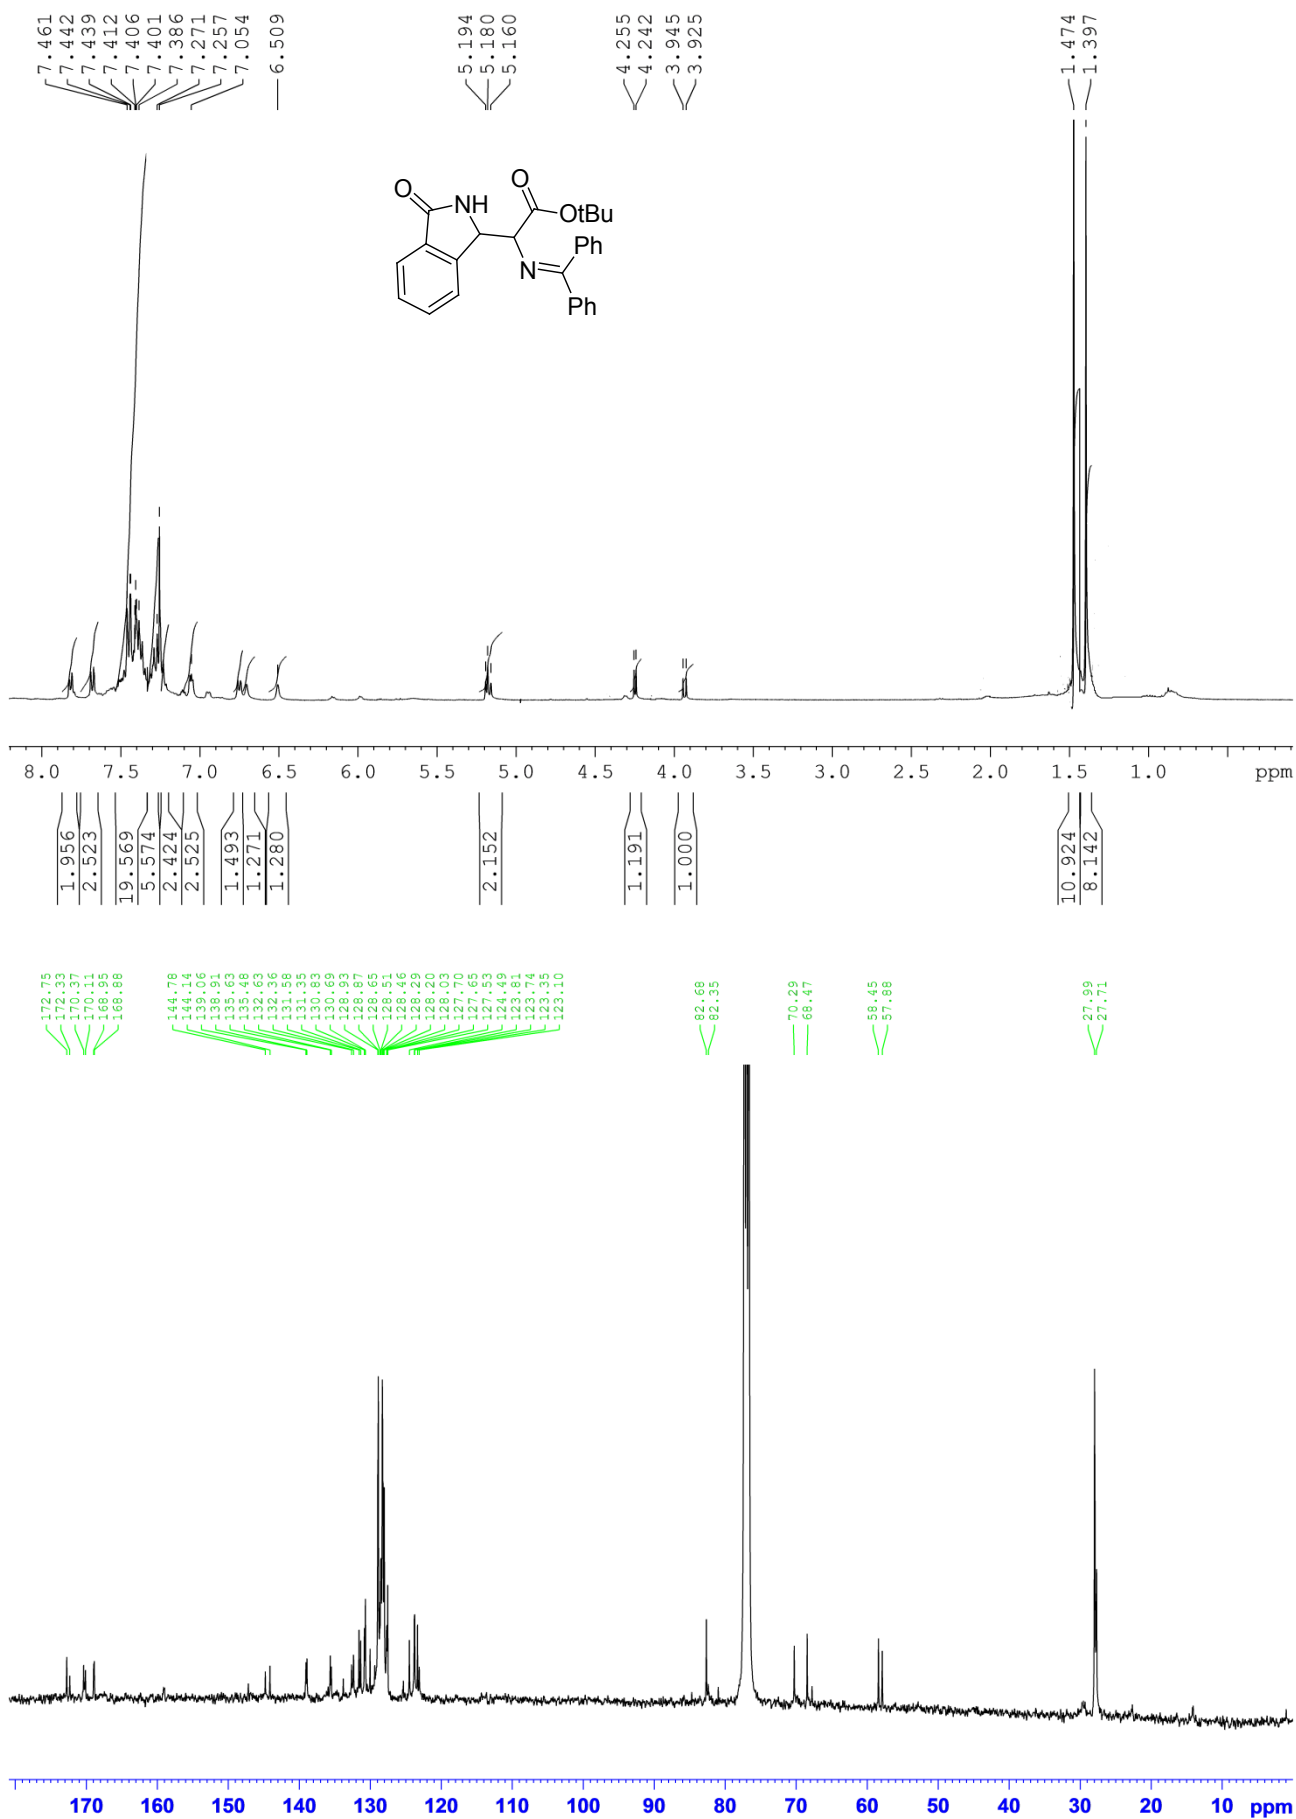

### Single diastereomer

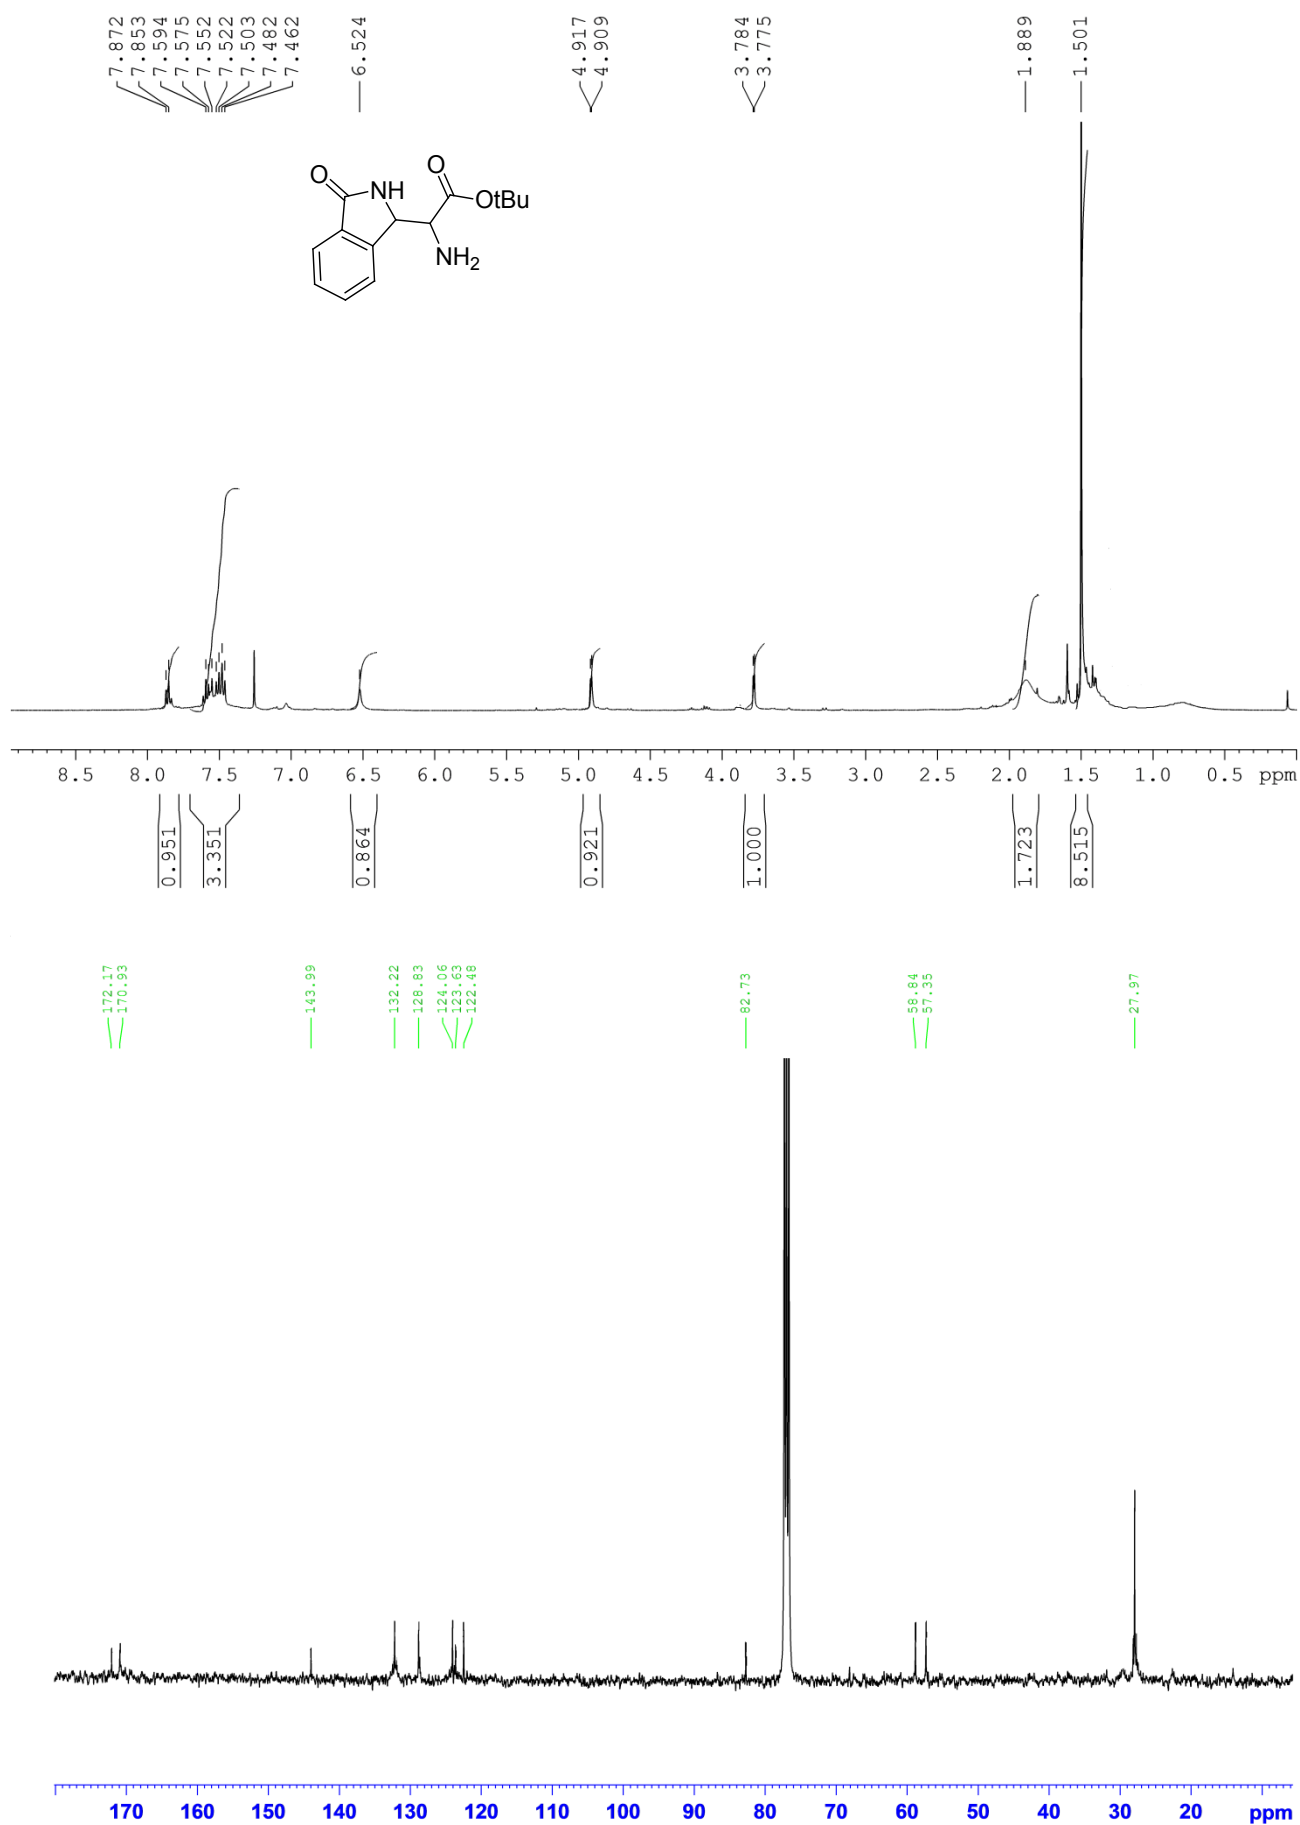

### Mixture of diastereomers

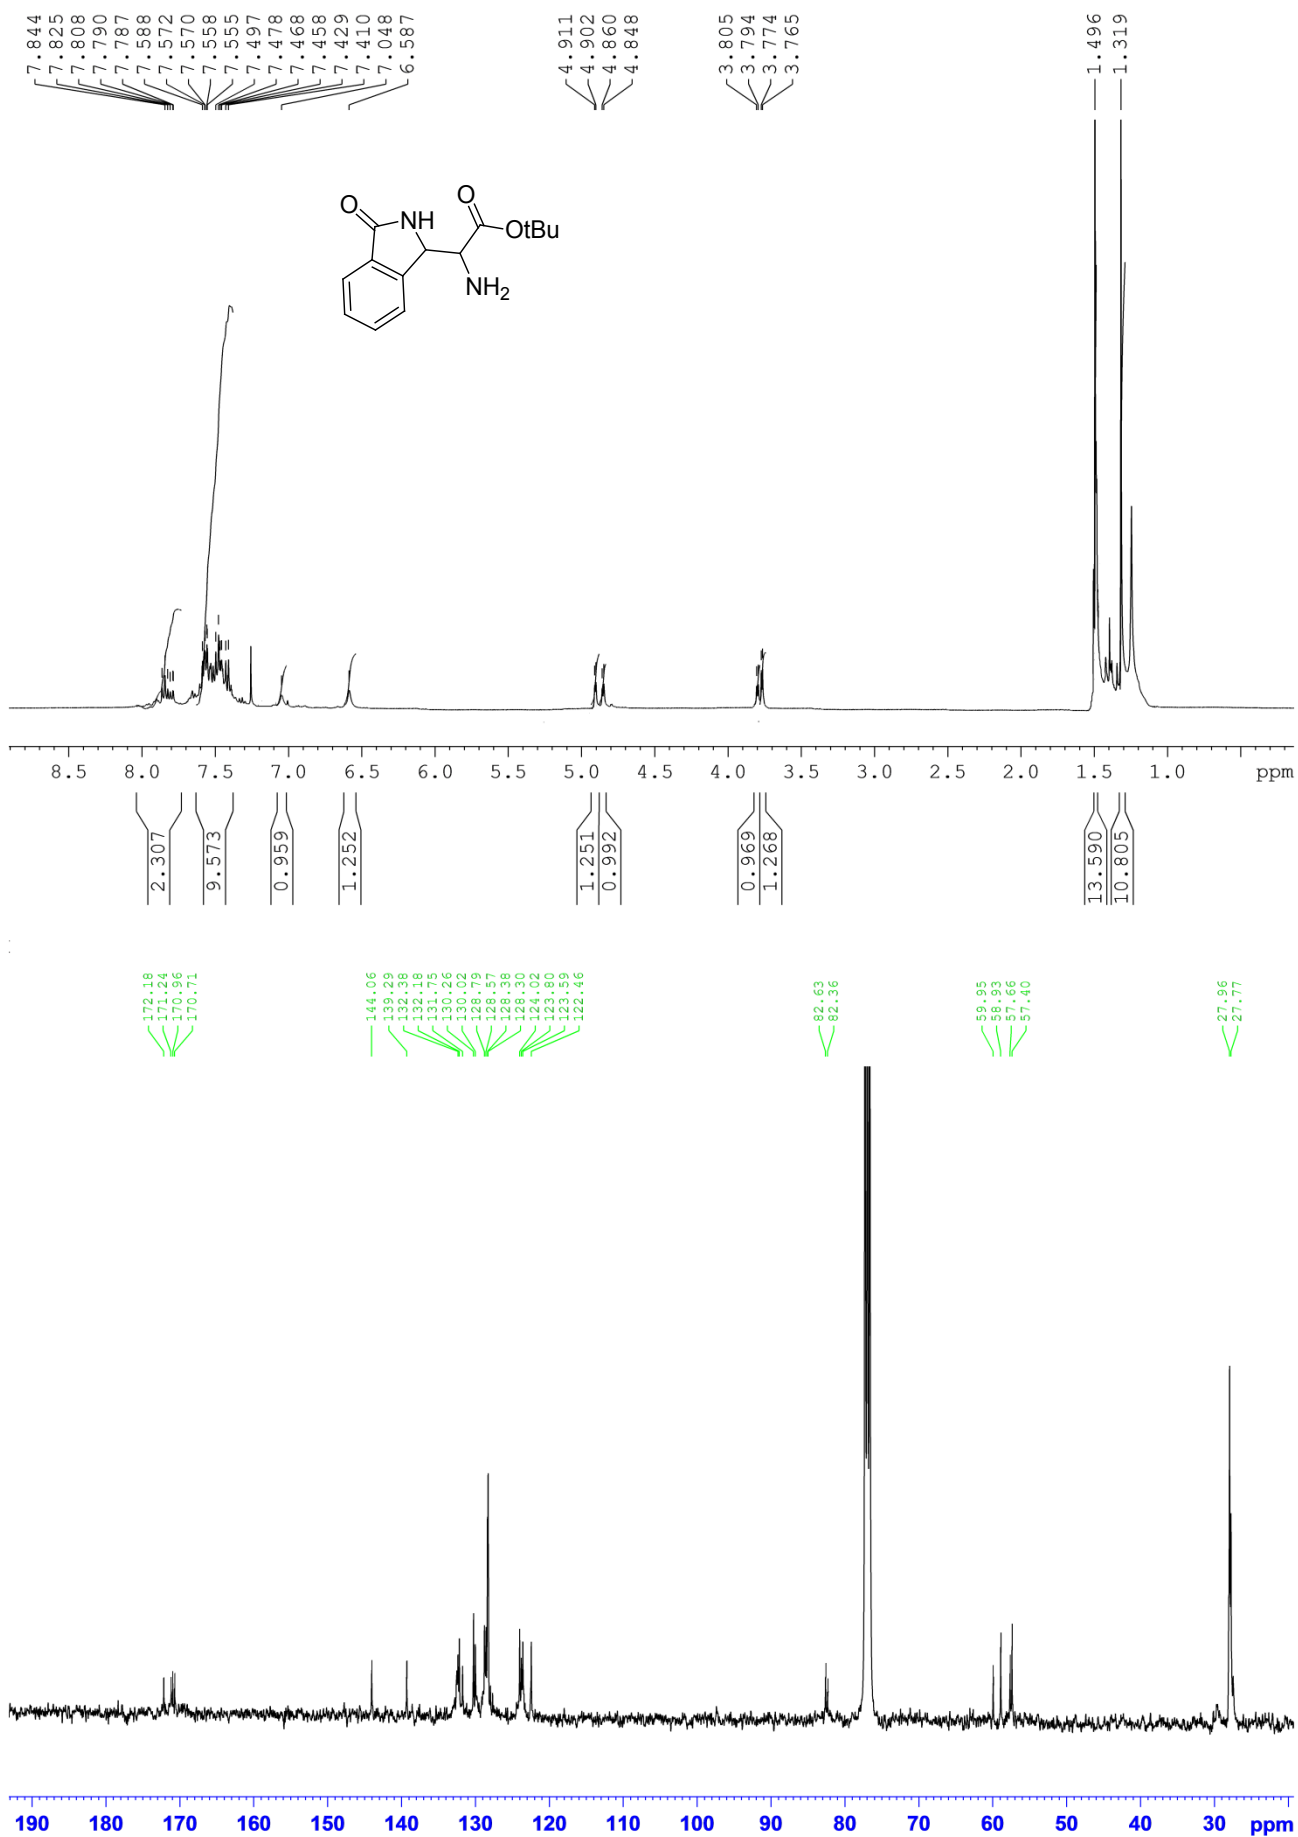

### Mixture of diastereomers

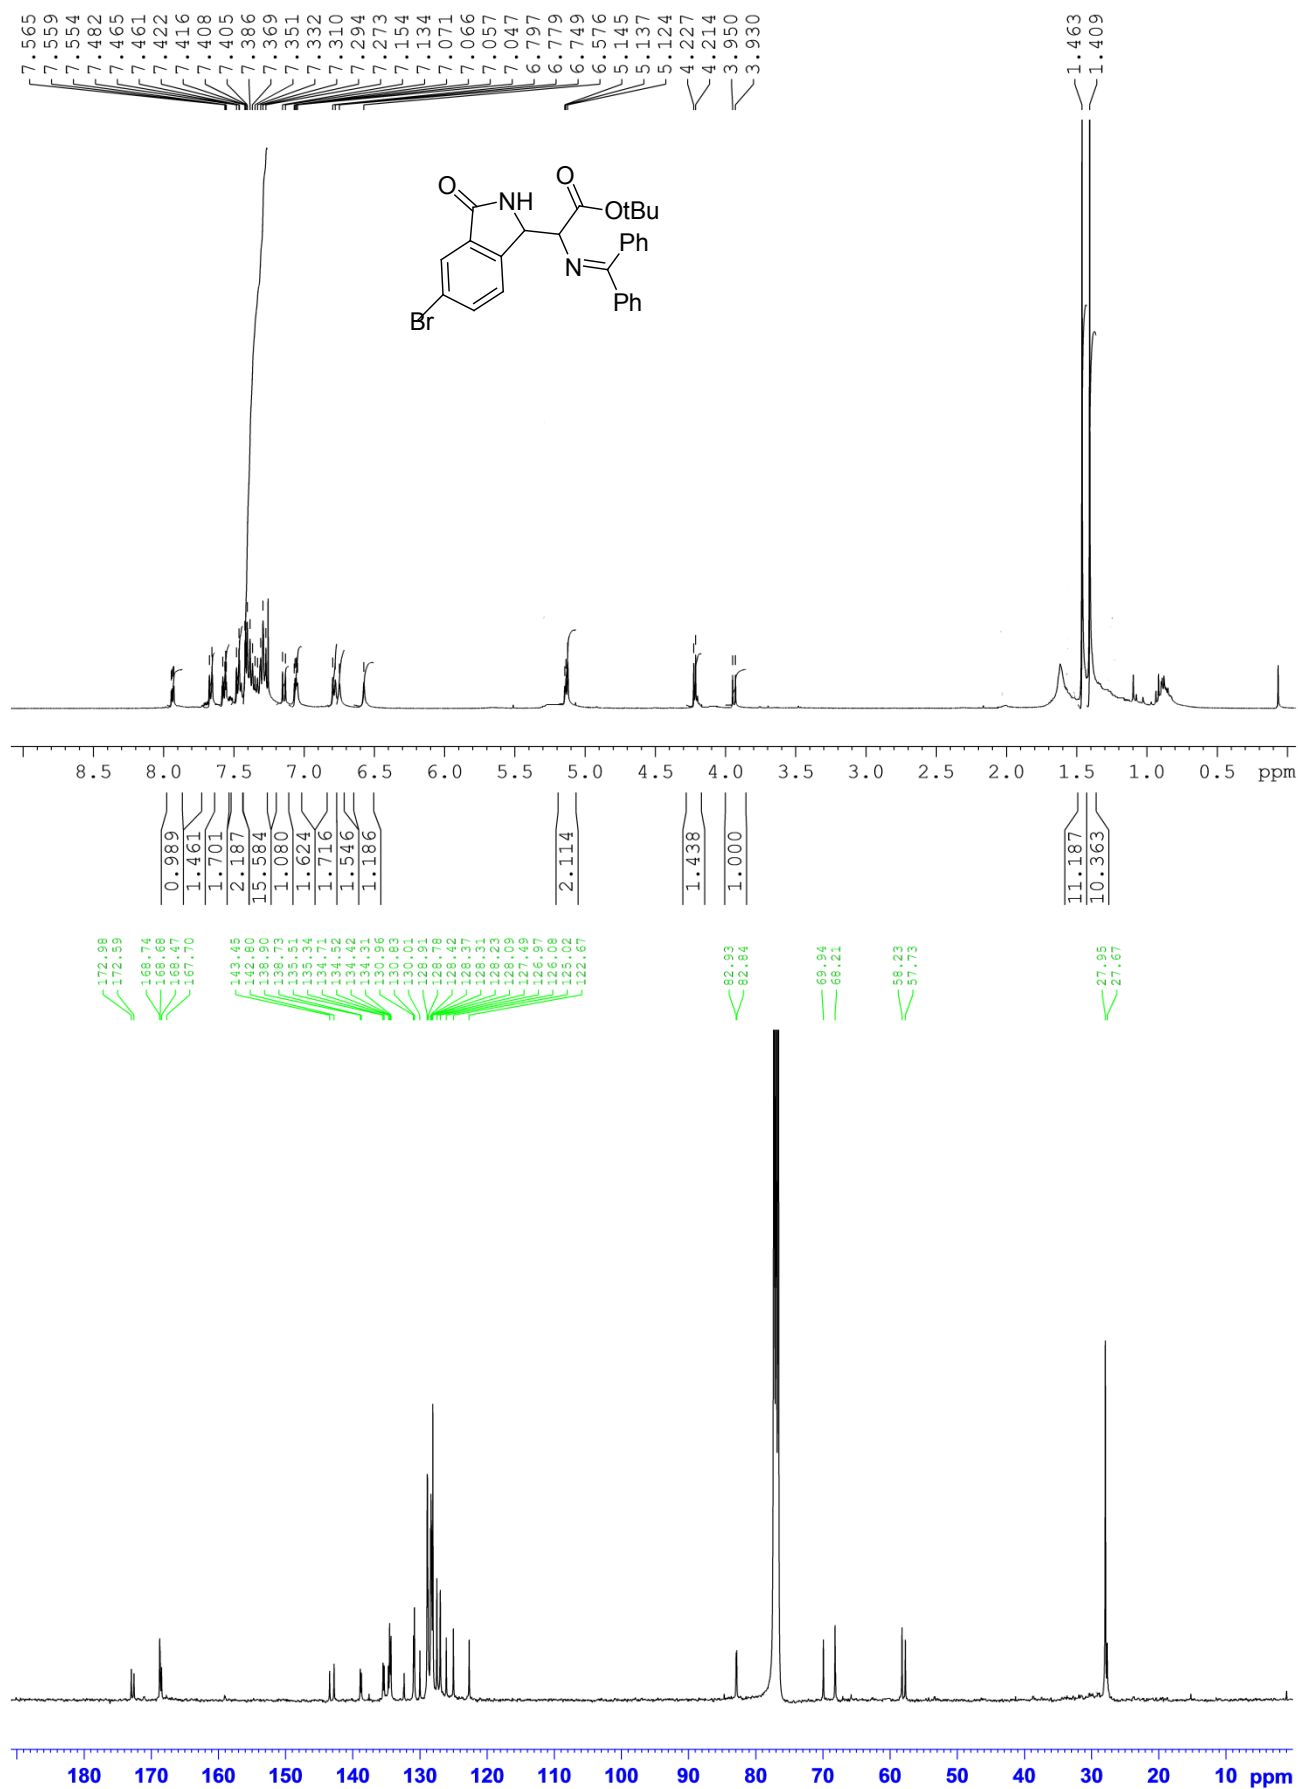

### Single diastereomer

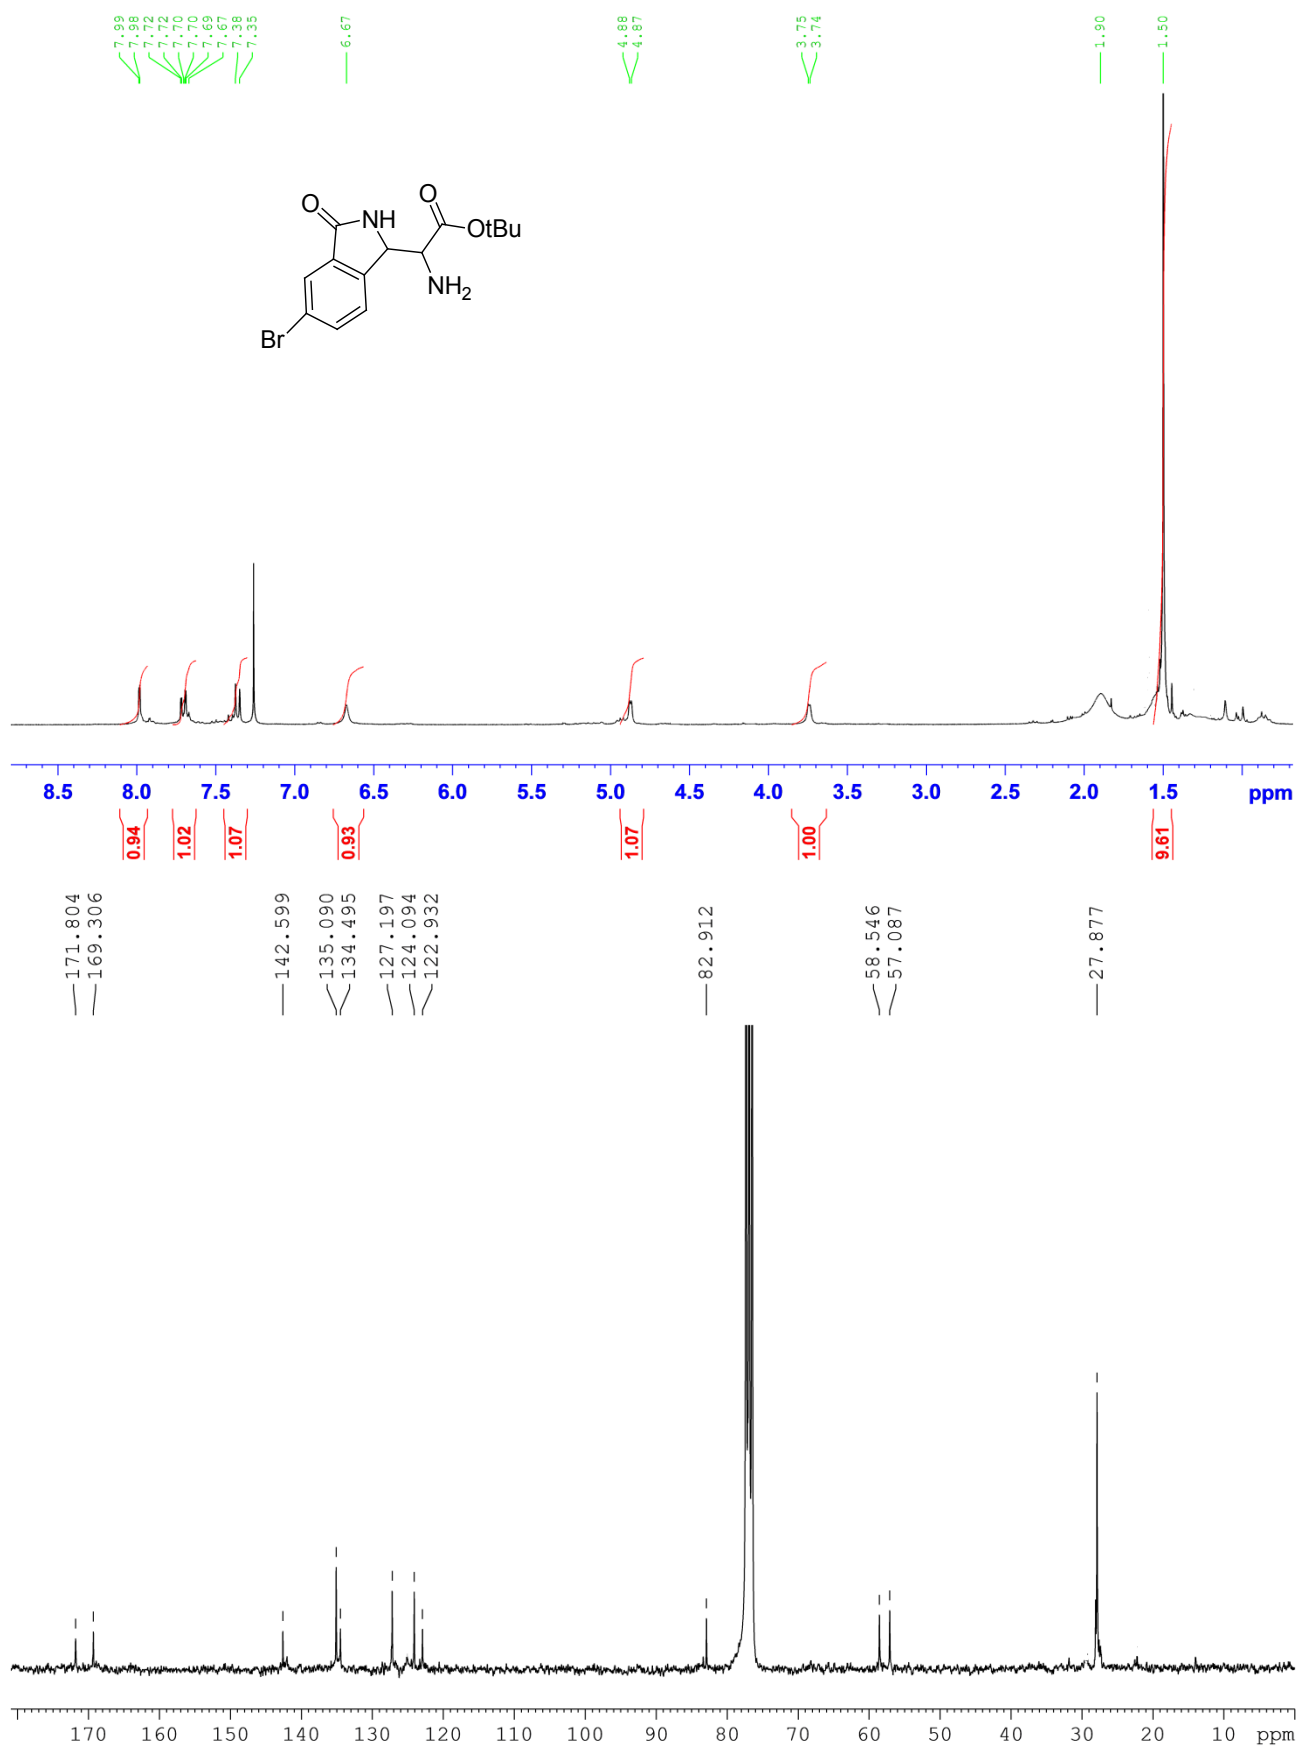

### Mixture of diastereomers

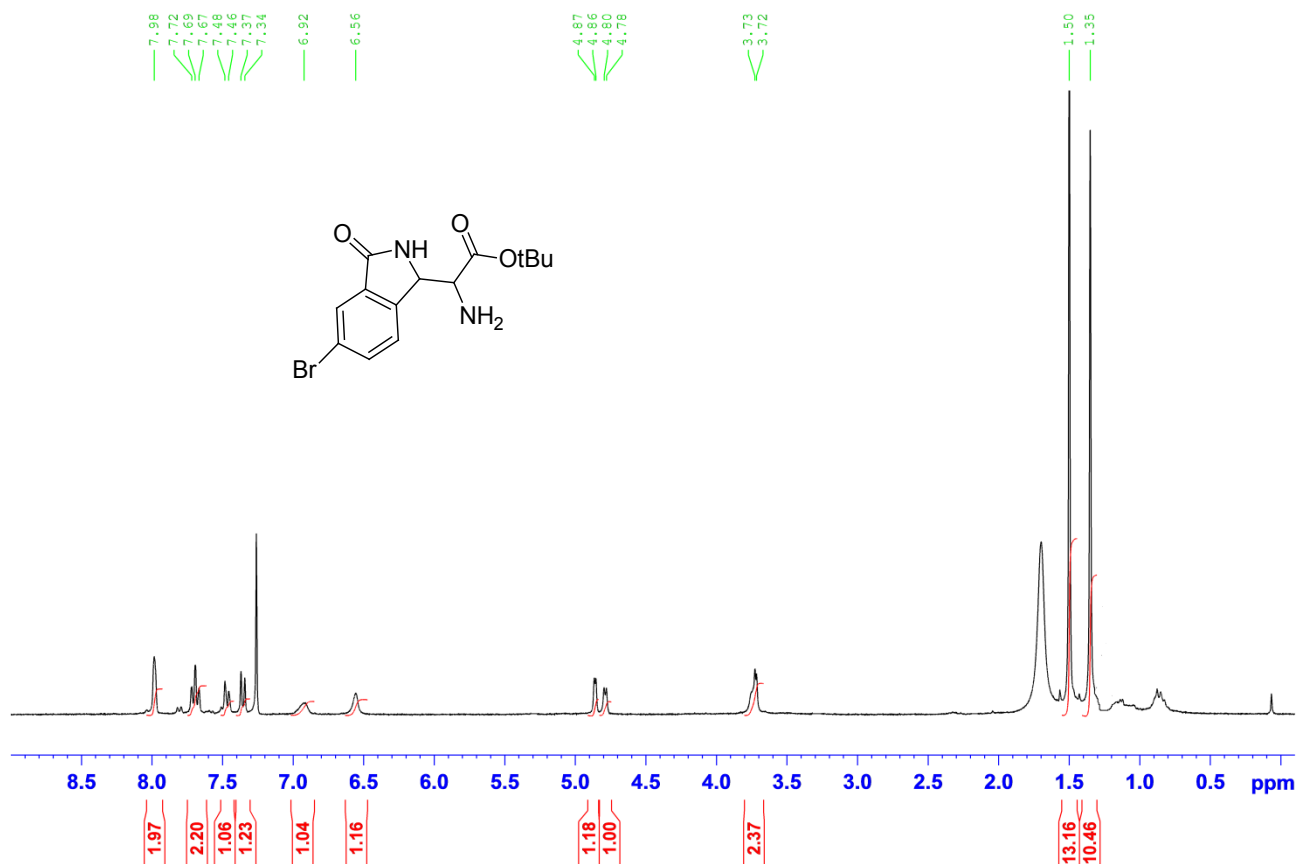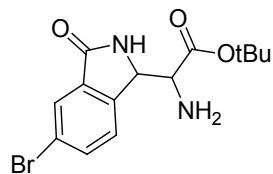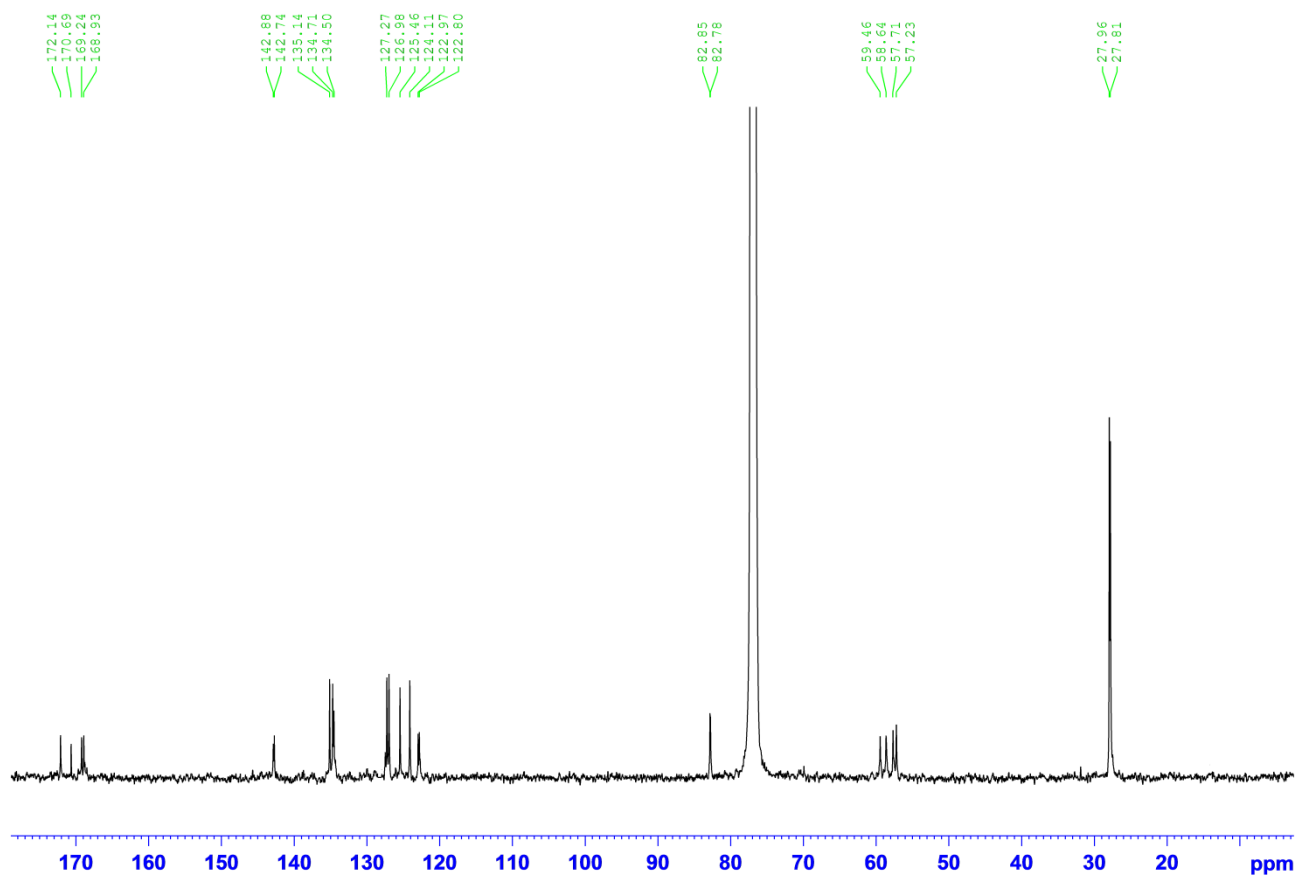

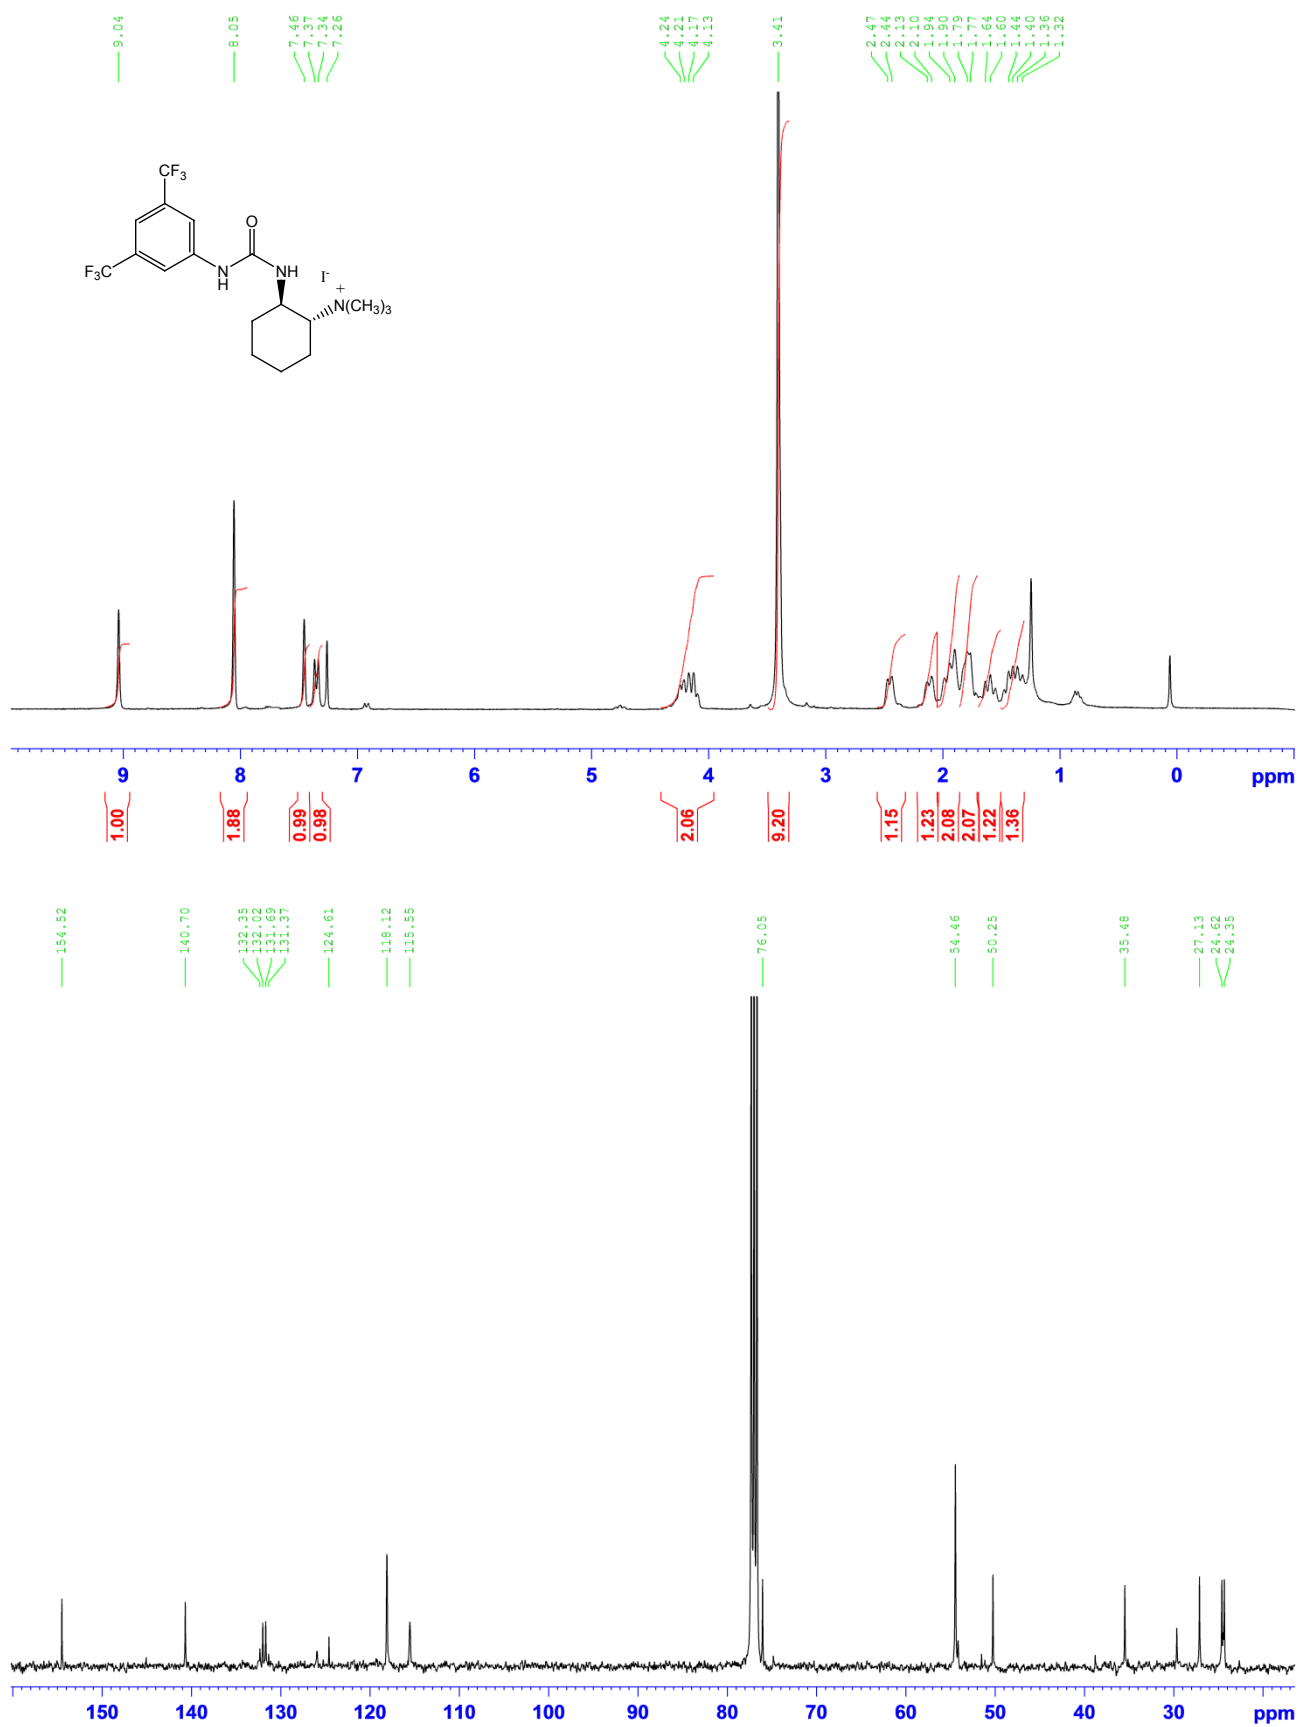

### HPLC traces of the major diastereomer

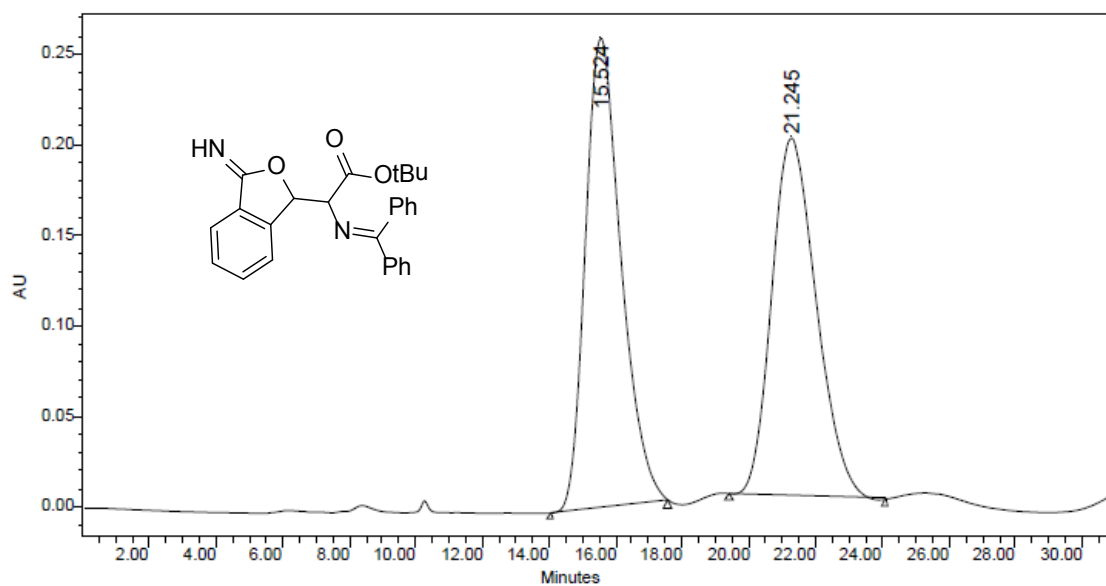

|   | RT (min) | Area (V*sec) | % Area | Height (V) | % Height |
|---|----------|--------------|--------|------------|----------|
| 1 | 15.524   | 19358486     | 51.30  | 259039     | 56.76    |
| 2 | 21.245   | 18378969     | 48.70  | 197318     | 43.24    |

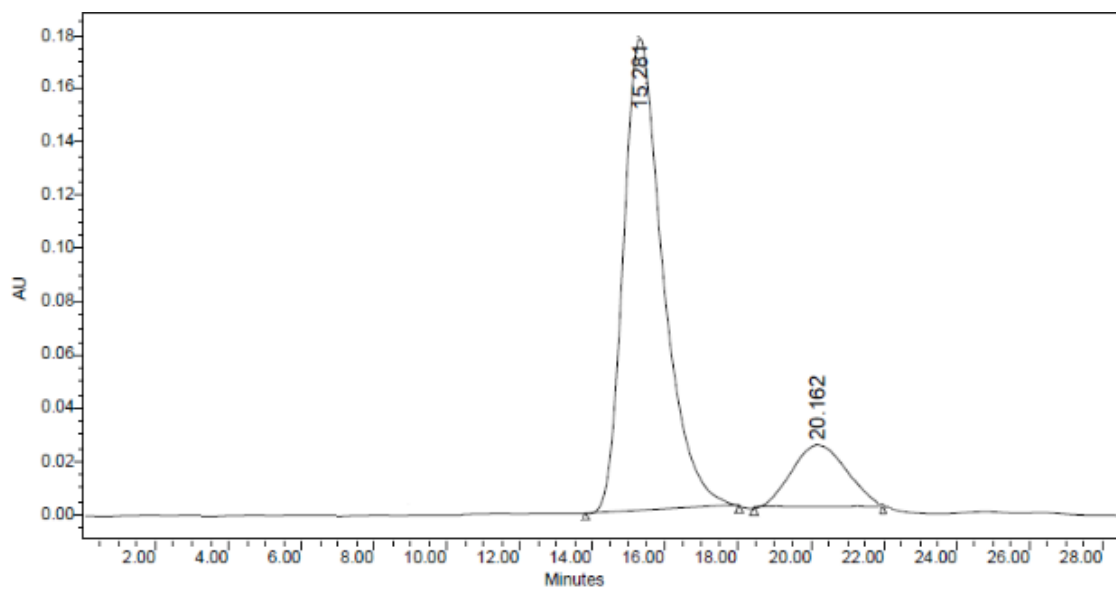

|   | RT (min) | Area (V*sec) | % Area | Height (V) | % Height |
|---|----------|--------------|--------|------------|----------|
| 1 | 15.281   | 13495876     | 85.09  | 177729     | 88.57    |
| 2 | 20.162   | 2365073      | 14.91  | 22925      | 11.43    |



### HPLC traces of *rac* mixture of two diastereomers in *dr* = 1.6/1

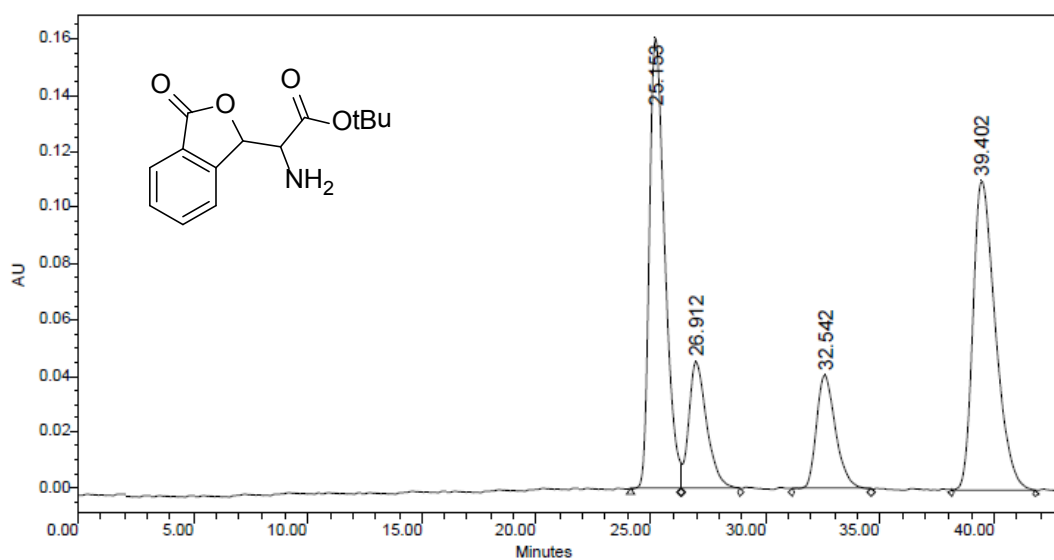

|   | RT (min) | Area (V*sec) | % Area | Height (V) | % Height |
|---|----------|--------------|--------|------------|----------|
| 1 | 25.153   | 7562309      | 37.75  | 160393     | 44.99    |
| 2 | 26.912   | 2501911      | 12.49  | 45354      | 12.72    |
| 3 | 32.542   | 2432791      | 12.14  | 40788      | 11.44    |
| 4 | 39.402   | 7535374      | 37.62  | 109982     | 30.85    |

### HPLC trace of enantioenriched major diastereomer.

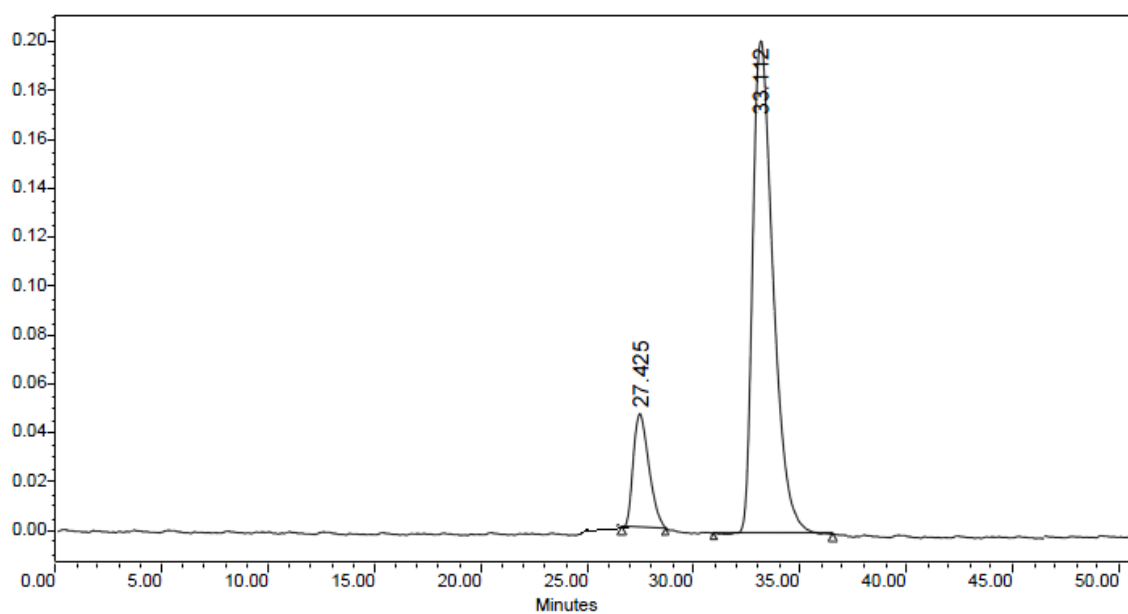

|   | RT (min) | Area (V*sec) | % Area | Height (V) | % Height |
|---|----------|--------------|--------|------------|----------|
| 1 | 27.425   | 2383510      | 14.98  | 46558      | 18.76    |
| 2 | 33.112   | 13527927     | 85.02  | 201680     | 81.24    |

### HPLC trace of *rac*- major diastereomer

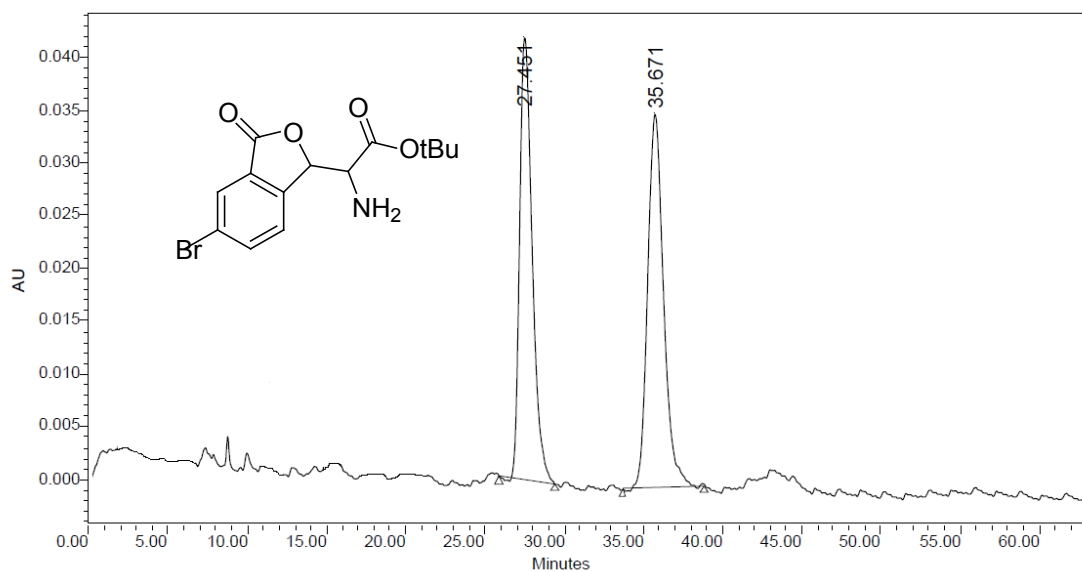

|   | RT (min) | Area (V*sec) | % Area | Height (V) | % Height |
|---|----------|--------------|--------|------------|----------|
| 1 | 27.451   | 2319447      | 48.16  | 41894      | 54.18    |
| 2 | 35.671   | 2496237      | 51.84  | 35427      | 45.82    |

### HPLC trace of enantioenriched major diastereomer

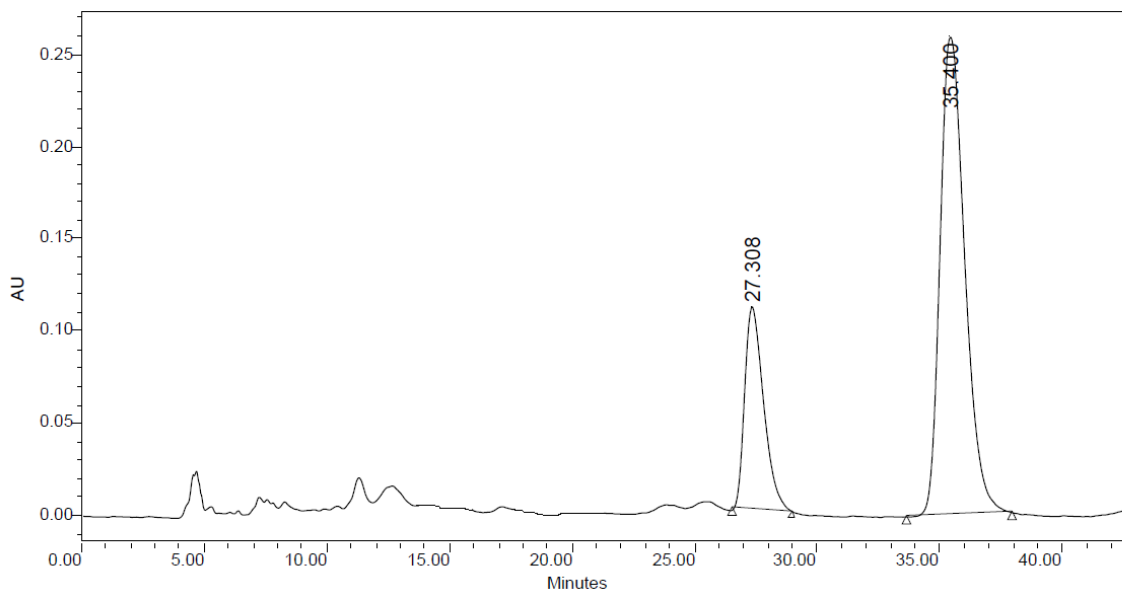

|   | RT (min) | Area (V*sec) | % Area | Height (V) | % Height |
|---|----------|--------------|--------|------------|----------|
| 1 | 27.308   | 5933332      | 24.54  | 110011     | 29.80    |
| 2 | 35.400   | 18244323     | 75.46  | 259186     | 70.20    |
